1       **Phage recombination drives evolution of spore-forming *Bacilli***

2

3       Anna Dragoš<sup>1\*</sup>, Priyadarshini B.<sup>1</sup>, Zahraa Hasan<sup>1</sup>, Mikael Lenz-Strube<sup>1</sup>, Paul J Kempen<sup>2</sup>,  
4       Gergely Maróti<sup>3</sup>, Charlotte Kaspar<sup>4,5</sup>, Baundauna Bose<sup>6</sup>, Briana M. Burton<sup>7</sup>, Ilka B Bischofs<sup>4,5</sup>,  
5       Ákos T. Kovács<sup>1\*</sup>

6

7       <sup>1</sup> Department for Biotechnology and Biomedicine, Technical University of Denmark, 2800  
8       Kongens Lyngby, Denmark

9       <sup>2</sup> Department of Health Technology, Technical University of Denmark, 2800 Kongens Lyngby,  
10       Denmark

11       <sup>3</sup> Institute of Plant Biology, Biological Research Centre, Hungarian Academy of Sciences, H-  
12       6701 Szeged, Hungary

13       <sup>4</sup> BioQuant Center of the University of Heidelberg, 69120 Heidelberg, Germany

14       <sup>5</sup> Max-Planck-Institute for Terrestrial Microbiology, 35043, Marburg, Germany

15       <sup>6</sup> Gro Biosciences, Cambridge, MA 02139

16       <sup>7</sup> Department of Bacteriology, University of Wisconsin, WI 53706, Madison, USA

17

18       \* Corresponding authors: Bacterial Interactions and Evolution Group, Department of  
19       Biotechnology and Biomedicine, Technical University of Denmark, Søtofts Plads Building  
20       221, 2800 Kongens Lyngby, Denmark

21       Tel: +45 26272642; Fax: +45 45 932809; E-mail: [adragos@dtu.dk](mailto:adragos@dtu.dk);

22       Tel: +45 45 252527; Fax: +45 45 932809; E-mail: [atkovacs@dtu.dk](mailto:atkovacs@dtu.dk);

23

24 **Abstract**

25 Phages are the main source of within-species bacterial diversity and drivers of horizontal gene  
26 transfer. Prophage cargo can determine ecological interactions of a bacterium with other  
27 community members, and even its pathogenic potential, but we know little about the  
28 mechanisms that drive genetic diversity of these mobile genetic elements (MGEs). Recently,  
29 we showed that a sporulation selection regime promotes evolutionary changes within SP $\beta$   
30 prophage of *Bacillus subtilis*, leading to direct antagonistic interactions within the population.  
31 Interestingly, SP $\beta$  belongs to the so-called phage regulatory switches that precisely excise from  
32 the chromosome of sporulating mother cells, a phenomenon observed for phages infecting  
33 diverse spore-forming species. Herein, we reveal that under a sporulation selection regime, SP $\beta$   
34 recombines with low copy number phi3Ts phage DNA present within the *B. subtilis* population.  
35 Recombination results in a new prophage occupying a different integration site, as well as the  
36 spontaneous release of virulent phage hybrids. Analysis of *Bacillus* sp. strains suggests that  
37 SP $\beta$  and phi3T belong to a distinct cluster of unusually large phages inserted into sporulation-  
38 related genes that are equipped with a spore-related genetic arsenal. Comparison of *Bacillus*  
39 sp. genomes at global and local ecological scales indicates that these SP $\beta$ -like phages diversify  
40 rapidly, especially in the absence of other MGEs constraining their lytic cycle. Our study  
41 captures inter-phage recombination under an experimentally imposed selection regime, and  
42 reveals the ubiquity of similar phenomena in *Bacillus* sp. genomic data. Therefore, our work is  
43 a stepping stone toward empirical studies on phage evolution, and understanding the eco-  
44 evolutionary relationships between bacteria and their phages.

45

46

47

## 48 Introduction

49 Bacteriophages are major regulators of bacteria. Each day, approximately half of all bacterial  
50 biomass is killed by lytic phages, imposing a constant predator-prey evolutionary arms race<sup>1-</sup>  
51 <sup>3</sup>. Moreover, phages reside in 40–50% of bacterial genomes as prophage elements<sup>4</sup>, serving as  
52 a main source of intra-species genetic diversity and gene transfer agents<sup>5</sup>. Although prophages  
53 can be considered genetic parasites, they can also benefit their host with new metabolic  
54 functions, survival strategies or weapons for inter-bacterial warfare<sup>4-6</sup>. Despite the abundance  
55 and relevance of prophages in bacterial genomes, we still understand very little about their  
56 ecological and evolutionary imprint. This knowledge gap is particularly paramount for non-  
57 pathogenic bacterial agents, such as widely applied biocontrol and probiotic bacterial strains  
58 of agricultural and medical importance. Notably, genomes of certain beneficial bacterial genera  
59 (e.g. *Bacillus* sp.) are extremely rich in prophages<sup>7</sup>. Moreover, prophage cargo divergence in  
60 certain *Bacillus* species (e.g. *Bacillus subtilis*) leads to social ‘incompatibility’, which  
61 manifests in strong competitive interactions and physical barriers between bacterial swarms<sup>8,9</sup>.  
62 Currently, we do not understand what promotes diversity within the prophage cargo of closely  
63 related strains.

64 Based on striking mosaicism of prophage genomes, we believe that they  
65 predominantly evolve through recombination<sup>10-12</sup>. Through exchange of functional groups of  
66 genes (modules), phages can rapidly gain or lose functions<sup>11,13</sup>. Recombination between  
67 phages or between phages and their hosts can be either homologous<sup>14,15</sup> or non-homologous<sup>16</sup>,  
68 relying on phage- or host-encoded recombinases<sup>14,17</sup>. It was proposed that gene shuffling  
69 regularly occurs between (functional or defective) prophages and phages that co-infect the  
70 same host bacterium<sup>14</sup>. It was also shown that prophages of naturally competent bacteria (e.g.  
71 *B. subtilis*) can recombine with foreign phage DNA via transformation<sup>18</sup>. Finally, phages can  
72 randomly or specifically incorporate fragments of host chromosomes via generalised<sup>19,20</sup> or

73 specialised<sup>21,22</sup> transduction, respectively, thereby contributing to the spread of antibiotic  
74 resistance<sup>20</sup> or virulence genes<sup>23</sup>. Although evidence from comparative phage genomics  
75 indicates frequent recombination into new phage variants (so-called gene shuffling)<sup>13,24,25</sup>, this  
76 is not reflected in experimental research. Phage recombination has been experimentally studied  
77 using limited models, predominantly *Salmonella typhimurium* P22 with *Escherichia coli*  
78 lambdoid phages<sup>26,27</sup>. Therefore, despite our knowledge of pronounced genomic mosaicism,  
79 empirical research on prophage evolution is relatively limited. Combining such research with  
80 broader comparisons of available host genomes may prove key to understanding the ecology  
81 and evolution of bacteria and phages, including whether prophages serve as a major source of  
82 bacterial within-species diversity, or as regulators.

83           Interestingly, certain prophages of *Bacilli* undergo genetic rearrangements upon  
84 host development, acting as so-called phage regulatory switches (RSs)<sup>28</sup>. RS phages can switch  
85 between integrated and extrachromosomal forms to modulate reproduction and survival of their  
86 hosts, through processes that differ from classical lysogeny or lysis<sup>28</sup>. To date, most  
87 documented RS phages have been detected in Firmicutes as regulators of the sporulation  
88 process<sup>29-32</sup>, associated with vegetative cells transforming into partially dehydrated dormant  
89 spores, and related to resistance to extreme conditions, including starvation for millions of  
90 years<sup>33,34</sup>. Certain *B. subtilis* biocontrol strains carry an SP $\beta$  prophage or its derivative that  
91 integrates into the polysaccharide-related gene *spsM*, and this genetic interruption prevents  
92 robust submerged biofilm formation in the host<sup>29,35</sup>. In addition, in SP $\beta$  prophage-harboring  
93 strains, immediately prior to sporulation the prophage undergoes precise excision and  
94 circularisation, allowing *spsM* reconstitution and expression in the sporulating mother cell. The  
95 resulting *spsM*-related polysaccharide eventually becomes part of the spore coat, contributing  
96 to spore dispersability<sup>29</sup>. Besides SP $\beta$ , another prophage-like element named *skin* also  
97 undergoes excision in the mother cell, allowing reconstitution of *sigK* encoding a late

98 sporulation sigma factor that is necessary for completing the sporulation process<sup>32,36,37</sup>. Similar  
99 mother cell-specific excisions have been observed in other *Bacillus* sp.<sup>29</sup> and in *Clostridium*  
100 sp.<sup>31,38</sup>, but we do not understand what drives such a distinctive relationship between spore-  
101 forming hosts and their phages, nor what eco-evolutionary consequences this has. Interestingly,  
102 SP $\beta$  and *skin* both encompass genes relevant for sporulation, including *sspC* that is crucial for  
103 spore DNA protection and repair<sup>39,40</sup>, and the *rapE-phrE* signalling system involved in  
104 sporulation initiation<sup>41,42</sup>. Furthermore, certain prophages can improve or even restore  
105 sporulation in *B. subtilis*<sup>43</sup>, suggesting the possibility of a cooperative relationship between  
106 certain phages and spore-formers.

107           We recently demonstrated that under a repeated imposed sporulation selection  
108 regime, SP $\beta$  prophages of *B. subtilis* undergo major genetic rearrangements, giving rise to new  
109 hybrid phages<sup>44</sup>. Normally, the lytic cycle of SP $\beta$  prophages is blocked by the ICEBs1  
110 (Integrative and Conjugative Element of *B. subtilis*) conjugative element<sup>45</sup>, and new phage  
111 variants are released spontaneously, killing or infecting the original host<sup>44</sup>. Therefore, it is  
112 important to reveal the genetic changes that lead to prophage awakening, and determine  
113 whether similar prophage evolution pathways occur outside the laboratory.

114           Herein, we investigated the triggering cause of diversification and spontaneous  
115 release of SP $\beta$  prophages, and sought evidence for similar diversification of SP $\beta$  taking place  
116 in nature. Using experimental evolution, *de novo* genome sequencing and testing, we showed  
117 that barely detectable, low copy number phage DNA residing in certain *B. subtilis* strains can  
118 propagate under an appropriate selection regime, and hybridise with indigenous prophages.  
119 These new prophage elements modulate host development, most likely through regulatory  
120 genes. Bioinformatic comparison of prophage elements within available *Bacillus* sp. genomes  
121 demonstrated that similar recombination may frequently occur in nature between SP $\beta$  and

122 related phages. Our work shows how diversification of prophages through recombination can  
123 drive early diversification of bacterial populations.

124

## 125 **RESULTS**

### 126 **Strains evolved under a sporulation selection regime carry hybrid prophages**

127 We previously showed that several passages of *B. subtilis* through the dormant spore stage  
128 leads to genome rearrangements within prophage elements and release of phage particles into  
129 the culture medium (Fig. 1A). Some of these phages resemble indigenous SP $\beta$ <sup>46</sup>, but unlike  
130 SP $\beta$  prophages they are produced spontaneously and facilitate killing of the original SP $\beta$   
131 lysogenic strain<sup>44</sup> (Fig. 1B). To further characterise the genetic changes within the prophage  
132 regions of these evolved strains, three isolates (B310mA, B410mB and B410wtB)<sup>44</sup> were  
133 subjected to long-read genome sequencing using the PacBio platform (see Materials and  
134 Methods). *De novo* sequencing revealed the presence of an exogenous SP $\beta$ -like prophage (58%  
135 sequence identity), which was nearly identical to *Bacillus subtilis* phage phi3T (KY030782.1;  
136 99.98% sequence identity)<sup>47</sup> in all three strains (Fig. 1C, Suppl. Fig. 1A). We named these  
137 extrachromosomal phage elements phi3Ts. The only difference between previously sequenced  
138 phi3T and phi3Ts was a 725 bp fragment (labelled ‘s’ for sporulation-derived) within phi3Ts,  
139 replacing the 1265 bp fragment of phi3T (nucleotides 101,429–102,694; Fig. 1D). Strikingly,  
140 the ‘s’ fragment shares no homology with phi3T or *B. subtilis* 168 chromosomes, but it could  
141 be found within SP $\beta$ -like prophages of six *B. subtilis* strains isolated in different regions around  
142 the world (see Materials and Methods; Fig. 1D). In the evolved strains, the phi3Ts prophage  
143 either disrupted the *kamA* gene located ~11 kb from SP $\beta$ , or it created a hybrid with SP $\beta$  with  
144 a ~11 kb fragment deleted between *kamA* and SP $\beta$  (Fig. 1C, Suppl. Fig 1A). In addition,

145 sequencing coverage within the described prophage regions was increased several-fold,  
146 suggesting augmented replication of hybrid phage DNA (Suppl. Fig. 1B, Suppl. dataset 1).

147

### 148 **Hybrid lysogens produce virulent hybrid phages**

149 In view of the presence of phi3Ts, SP $\beta$  and phage hybrids on the chromosomes of the evolved  
150 strains (Fig. 1C, Suppl. Fig. 1A), we were curious which phages are spontaneously released into  
151 the medium<sup>44</sup>. Therefore, phages released by the evolved strains were purified from single  
152 plaques and subjected to genome sequencing (see Materials and Methods). Notably, each  
153 evolved strain produced a mix of turbid and clear plaques, but at different relative frequencies  
154 (Suppl. Fig. 1C). Turbid plaques are typical for temperate phages (like SP $\beta$  or phi3T), while  
155 clear plaques are usually formed by phage variants that have lost their ability to enter the  
156 lysogenic cycle<sup>48</sup>. Phage sequencing revealed that the spontaneously produced phages were  
157 either phi3Ts or phi3Ts-SP $\beta$  hybrids (Fig. 1C, Suppl. Fig. 1A, Suppl. Fig. 2). Sequences of all  
158 phages obtained from the turbid plaques matched prophage sequences within the evolved  
159 strains (Fig. 1C, Suppl. Fig. 1A, Suppl. Fig. 2). In addition, the genome of Hyb1<sup>phi3Ts-SP $\beta$</sup>   
160 (released by B310mA) was extended by a ~1.2 kb fragment of the host chromosome (*yoze*,  
161 *yokU*, and part of the *kamA* gene), indicating specialised transduction, a process that occurs  
162 when a phage picks up a fragment of host chromosomal DNA in the immediate vicinity of its  
163 attachment site (Fig. 1C, Suppl. Fig. 2). In contrast to the turbid plaque-creating phages, all  
164 phages obtained from clear plaques were phi3Ts-SP $\beta$  hybrids, which were not present on the  
165 chromosomes of their corresponding producers (Fig. 1C, Suppl. Fig. 1A, Suppl. Fig. 2). This  
166 suggests that phi3Ts-SP $\beta$  recombination not only gave rise to hybrid prophages, but also to a  
167 range of virulent phages. In addition to chromosomal DNA, in strains B410mB and B410wtB  
168 we identified a variety of extrachromosomal phage DNA (epDNA) fragments ranging from

169 10.9 to 66 kb (Fig. 2, Suppl. dataset 1). The epDNA was dominated by phi3Ts-SP $\beta$   
170 recombinants, in which DNA from the two parental phages was joined at the homologous  
171 region (Fig. 2). None of the hybrid epDNA was identical to sequences of hybrid phages  
172 released by the corresponding strains (B410mB and B410wtB; Fig. 2, Suppl. Fig. 2). Finally,  
173 we also noticed that some epDNA fragments contained parts of the bacterial chromosome  
174 adjacent to the phi3Ts integration site, again pointing towards specialised transduction (Fig. 2).

175

### 176 **A sporulation selection regime promotes foreign phage invasion**

177 Next, we aimed to identify the source of phi3Ts DNA in the evolved host genomes, and to  
178 determine whether this DNA was already present in the ancestor *B. subtilis* 168 stock or  
179 acquired as contamination during the evolution experiment. First, we repeated the mapping of  
180 raw sequencing reads from the *B. subtilis* 168 ancestral genome onto selected unique phi3T  
181 regions lacking homology with SP $\beta$ . Indeed, phi3Ts DNA was present in the ancestor strain at  
182 a very low but detectable level, rather than as an extrachromosomal form (Fig. 3, Suppl. Fig.  
183 3A), hence that only subset of cells contained the plasmid-like form of phi3Ts. On the other  
184 hand, phi3T could be clearly detected by mapping of resequencing reads of the evolved strains  
185 (Suppl. Fig. 3A).

186 The presence of phi3Ts DNA fragments in the ancestor was additionally  
187 confirmed by PCR using a series of primer sets specific for unique phi3Ts fragments, phi3Ts-  
188 *kamA* attachment sites, and the *kamA* gene (Suppl. Fig. 4). PCR performed on genomic DNA  
189 of *B. subtilis* 168 resulted in a strong band from the intact *kamA* gene, a weak band from  
190 selected fragments of phi3Ts, and very faint bands indicating *kamA* integration (Suppl. Fig.  
191 4A). Conversely, PCR on genomic DNA extracted from evolved strains showed the presence  
192 of very strong bands for both phi3Ts fragments, and left and right integration sides (except for



193 B310mA in which the right part of *kamA* was absent. As expected, strains B310mA and  
194 B410wtB1 were negative for intact *kamA*, while B410mB gave a weak product, which could  
195 be explained by incorporation of *kamA* into its epDNA (Fig. 2, Suppl. Fig. 4A).

196           The above analysis indicates that low copy number phi3Ts was present in the *B.*  
197 *subtilis* 168 stock from the start. Since *B. subtilis* 168 has been shared among research labs  
198 around the world, low copy number phi3Ts could also be ‘hiding’ in culture stocks of other  
199 research labs. Accidental detection of such low copy number phage DNA is nearly impossible,  
200 because (i) re-sequencing reads matching phi3Ts would be filtered out during standard  
201 mapping pipelines, and (ii) phi3Ts appears to only multiply and manifest itself under specific  
202 selection regimes. To check for possible contamination of other *B. subtilis* stocks with phi3Ts,  
203 we mapped raw re-sequencing data available in the NCBI database to the phi3T genome  
204 (KY030782.1). Analysis of five *B. subtilis* 168 genomes from different laboratories showed  
205 no evidence of phi3Ts contamination, since re-sequencing reads matched fragments with high  
206 homology to phi3T-*B. subtilis* 168 (Suppl. Fig 3B).

207           In addition to resequencing data analysis, we also PCR-screened a larger  
208 collection of *B. subtilis* 168 stocks from different labs around the world<sup>49</sup> for the presence of  
209 phi3Ts. Although the vast majority of tested strains lacked phi3Ts sequences (in agreement  
210 with sequencing data analysis), a very strong band was observed for *B. subtilis* 168  
211 ‘Newcastle’, suggesting that this strain was infected with phi3Ts, or a very similar prophage  
212 (Suppl. Fig. 4B). Further PCR analysis confirmed phage integration into the *kamA* gene, but  
213 also the presence of an intact *kamA*, indicating that a subpopulation of cells could be  
214 pseudolysogenic (Suppl. Fig. 4B). We also confirmed that, similar to the experimentally  
215 evolved strains, the Newcastle 168 strain contained the ‘s’ fragment, a unique sequence  
216 allowing the phi3Ts phage to be distinguished from the previously sequenced phi3T, hence it  
217 is a specific marker for the ‘laboratory’ phage variant (Fig. 1D).

218           As phi3Ts multiplies under a prolonged sporulation selection regime, we  
219 contacted colleagues who also performed experimental evolution with *B. subtilis* strains  
220 imposing the same or similar selection<sup>50,51</sup>. First, we approached a group from the University  
221 of Wisconsin-Madison, with whom we had not previously shared strains, because they  
222 published a study on the evolution of *B. subtilis* strain PY79 (NC\_022898.1) under a prolonged  
223 sporulation selection regime<sup>50</sup>. They kindly agreed to share raw sequencing data obtained from  
224 12 evolved single isolates, and we investigated potential changes within prophage regions, and  
225 searched for the presence of phi3Ts DNA. We did not find any mutations within prophage  
226 regions (Suppl. dataset 2). Furthermore, mapping of raw sequencing reads of evolved PY79  
227 strains to the phi3T genome excluded the presence of phi3T-specific DNA fragments (see  
228 Materials and Methods; Suppl. Fig. 5).

229           We also approached a group from the University of Groningen, who performed  
230 experimental evolution of *B. subtilis* 168 under nutrient-limited conditions in which bacteria  
231 could neither grow nor complete sporulation (due to *sigF* deletion)<sup>51</sup>. Mapping their raw  
232 sequencing reads to the phi3T genome clearly revealed the presence of phi3T-specific reads  
233 (Suppl. Fig. 3C). Similar to our case (Fig. 3, Suppl. Fig. 3A), the phage DNA was already  
234 present at the start, and it either gradually decreased or increased in two different biological  
235 samples (Suppl. Fig. 3C).

236           The above results strongly suggest that the prophage activation scenario requires  
237 not only a sporulation selection regime, but also contamination with low copy number phi3Ts  
238 DNA or phage particles. The exchange of strains between Newcastle University (the origin of  
239 *B. subtilis* 168 PCR-positive for the phi3Ts-specific fragment) and the University of  
240 Groningen, and later between the University of Groningen and our lab, represents a possible  
241 transmission route for phi3Ts.

242 Finally, the evolution experiment performed previously<sup>44</sup> was repeated under the  
243 sporulation selection regime using the undomesticated *B. subtilis* NCIB 3610 (hereafter 3610)  
244 strain in which the presence of phi3Ts DNA could not be detected during analysis of genome  
245 resequencing (Suppl. Fig. 3D, Suppl. Fig. 6A) or by PCR (Suppl. Fig. 6B). This time, alongside  
246 classical heat treatment (20 min at 80°C), a chemical spore-selection method (see Materials  
247 and Methods) was also employed, along with consecutive testing of lytic activity in the culture  
248 supernatant and analysis of the presence of phi3Ts DNA and the integrity of the *kamA* gene at  
249 every transfer (Suppl. Fig. 7). To our surprise, lytic activity (Suppl. Fig. 7A) and the release of  
250 phages (Suppl. Fig. 7B) were observed as early as the fourth transfer when the sporulation  
251 selection regime was applied. Similarly, targeted PCR analysis of host DNA revealed a gradual  
252 increase in the phi3T-specific PCR product and a gradual decrease in the PCR product  
253 corresponding to intact *kamA* (Suppl. Fig. 8). No lytic activity was observed in a parallel  
254 control treatment without the sporulation selection regime (Suppl. Fig. 7A).

255

## 256 **Foreign phages modulate sporulation dynamics**

257 We next explored whether propagation of low copy number phi3Ts DNA and its integration  
258 into the *kamA* gene has any positive fitness effects on *B. subtilis*. Since expression of *kamA* is  
259 dramatically increased upon sporulation entry (*SubtiWiki* website ([http://subtiwiki.uni-](http://subtiwiki.uni-goettingen.de)  
260 [goettingen.de](http://subtiwiki.uni-goettingen.de)), we hypothesised that *kamA* may encode a product that is metabolically costly  
261 and/or toxic for the bacterium, hence the phi3Ts/phi3Ts-SP $\beta$  hybrid lysogen may benefit from  
262 inactivation of this gene (Suppl. Figure 9A). However, competition assays between wild-type  
263 vs.  $\Delta$ *kamA* strains with and without sporulation selection revealed no difference in performance  
264 between strains (Suppl. Fig. 9B).

265 We hypothesised that certain genes encoded by phi3Ts may provide benefits to  
266 the host under a sporulation/spore revival selection regime. Therefore, we examined the  
267 sporulation and spore revival dynamics of *B. subtilis* 3610 deliberately infected with phi3T, a  
268 phage stock isolated from the lysogen available from the Bacillus genetic stock center (BGSC).  
269 We observed that the phi3T lysogen sporulated prematurely compared with the wild-type strain  
270 (Fig. 4). We also observed a general trend indicative of better revival of the phi3T lysogen  
271 (Suppl. Fig. 10A), which may include contributions from faster germination (Suppl. Fig. 10B)  
272 and/or an altered frequency of premature germination during dormancy (Suppl. Fig. 10C).

273 These observations indicate the possibility that phi3T/phi3Ts may encode  
274 proteins that influence the *B. subtilis* life cycle during sporulation and spore revival. Notably,  
275 sporulation regulators have been previously linked to mobile genetic elements (MGEs) in this  
276 species<sup>52-54</sup>. Annotation of phi3Ts and phi3Ts-SP $\beta$  hybrids (see Materials and Methods)  
277 revealed the presence of several genes that could modulate sporulation or spore traits.  
278 Specifically, we found a gene (labelled as *rapX*) encoding a putative Rap phosphatase (Suppl.  
279 Fig. 11, Suppl. Table 1) sharing high amino acid sequence identity with RapA (unique for  
280 phi3Ts) that is known to modulate sporulation timing<sup>55</sup>. We also found that the ‘s’ phi3Ts  
281 marker sequence may encode stationary phase survival protein YuiC (100% confidence Phyre  
282 prediction = 100% confidence), hence we labelled this sequence *spsX* (Suppl. Fig. 11). In  
283 addition, we identified *sspC* that controls spore resistance traits and encodes an acid-soluble  
284 protein involved in spore DNA protection (present on both SP $\beta$  and phi3Ts)<sup>56</sup>. Notably, we did  
285 not find genes that are known to affect spore revival (i.e. germination or spore outgrowth),  
286 suggesting that the effects on spore revival may be conferred indirectly (e.g. by modulation of  
287 sporulation timing)<sup>57</sup>. Together, these results suggest that the spread of phi3Ts under a  
288 prolonged sporulation selection regime might be partly driven by host benefits from the  
289 regulatory arsenal associated with phi3Ts and its hybrids.

290

291 **Recombination between SP $\beta$ -like prophages takes place on global and local ecological**  
292 **scales**

293 To understand the ecological relevance of extensive phage recombination observed under a  
294 sporulation selection regime, we performed global analysis of prophage elements within the *B.*  
295 *subtilis* clade including *B. cereus* for comparison of more distant species (see Materials and  
296 Methods). In a total of 350 fully-assembled genomes, 1365 prophage elements were identified  
297 using Phaster software (Suppl. dataset 3). Interestingly, we could immediately identify a cluster  
298 of rather large (<100 b) prophages integrated close to the replication terminus, just like phi3Ts,  
299 SP $\beta$  or phi3Ts-SP $\beta$  hybrids. These large prophages were found mainly (86%) within  
300 representatives of *B. subtilis*, *B. amyloliquefaciens*, *B. licheniformis* and *B. velezensis* species  
301 (Fig. 5A, Suppl. dataset 3). In total, we selected 78 strains carrying a large prophage close to  
302 the replication terminus for further analysis (see Materials and Methods; Suppl. Fig. 12A).

303           Among these strains we identified 23 (including SP $\beta$  lysogens *B. subtilis* NCBI  
304 3610 and *B. subtilis* 168) in which large prophages had split the *spsM* gene in a manner identical  
305 to SP $\beta$  (Suppl. dataset 3), and four *B. subtilis* isolates in which the *kamA* gene was split by a  
306 prophage region at exactly the same site, as observed in the hybrid lysogens (Suppl. dataset 3).  
307 In the remaining Bacillus strains, the large prophages were mostly integrated close to  
308 sporulation-related genes, including a homolog of *fisB* encoding a sporulation-specific  
309 membrane fission protein (*B. velezensis* SCDB 291), a homolog of *ymaG* encoding an inner-  
310 spore coat protein (*B. atrophaeus* BA59) and a homolog of *cotD* encoding an inner-spore coat  
311 protein (*Bacillus amyloliquefaciens* H). Interestingly, 10 strains carried extrachromosomal  
312 phage DNA (as predicted by Phaster; Suppl. dataset 3), and in one of them (*B. subtilis*  
313 SRCM103612) this epDNA was a truncated version of an SP $\beta$ -like prophage present within

314 the chromosome (Fig. 5B). The SRCM103612 prophage contained regions sharing homology  
315 to both SP $\beta$  and phi3Ts, indicating recombination and an unstable lysogenic cycle within SP $\beta$ -  
316 like recombinant phages in natural *B. subtilis* isolates (Fig. 5B).

317 To assess the within-species conservation of large prophages, we performed  
318 multiple sequence alignment of all the aforementioned prophage sequences. Prophages  
319 clustered according to host species, possibly as a result of phage-host specificity and/or  
320 prophage-host coevolution (Suppl. Fig. 12B). To assess the natural diversity of large SP $\beta$ -like  
321 prophages, we collected *Bacillus* sp. genomes carrying a large prophage splitting *spsM* or *kamA*  
322 (see Materials and Methods) and compared the phylogenetic tree obtained for these strains (see  
323 Materials and Methods) with the phylogenetic tree obtained for their SP $\beta$ -like prophages (Fig.  
324 6AB). The strains could be divided into six phylogenetic clades (Fig. 6A), while prophages  
325 clustered into three clades ('conservative', 'hybrid' and 'diverse'. The 'conservative' clade  
326 comprised prophages that were nearly identical to SP $\beta$ , that were also found within closely  
327 related *B. subtilis* strains (all were members of the 3610 clade; Fig. 6AB). The 'hybrid' clade  
328 comprised phi3T, phi3Ts and all phi3Ts-SP $\beta$  hybrids that evolved in the above described  
329 experiments under a sporulation selection regime (Fig. 6B). Within the 'diverse' clade the  
330 prophage relatedness did not match the phylogenetic relatedness of the host strains (Fig. 6AB).  
331 For example, in phylogenetically distinct NCD-2 and WR11, isolated from different sources  
332 (Suppl. dataset 3), an identical prophage disrupted the *spsM* gene. By contrast, prophages of  
333 closely related strains MB8\_B1 and MB8\_B10 that were isolated from the same mushroom  
334 differed in genetic architecture and in integration site. Indeed, we found that among *B. subtilis*  
335 isolates from the same soil sample below the mushroom<sup>58</sup>, one strain (MB8\_B7) carried an  
336 *spsM*-integrated SP $\beta$  prophage, one strain (MB8\_B1) carried a SP $\beta$ -like prophage in *spsM*, and  
337 one strain (MB8\_B10) carried an SP $\beta$ -like prophage in *kamA* (Fig. 6AB). Additionally, we  
338 noticed that nearly all members of the 'conservative' clade carried an intact copy of iCEBs1

339 that was shown to block the SP $\beta$  lytic cycle<sup>45</sup>, while this element is missing in all members of  
340 the ‘diverse’ clade (Fig. 6B). Finally, we could clearly see modules sharing high homology  
341 with SP $\beta$  and phi3T in the large prophages (Fig. 6C). These results are consistent with our lab  
342 data showing that SP $\beta$ -like phages diversify in nature, and this diversification may be  
343 constrained by other MGEs present on the host chromosome.

344

## 345 **Discussion**

346 The importance of phages in the ecology and evolution of bacteria is indisputable. Interactions  
347 between bacteria and temperate phages are especially complex, because the latter can serve as  
348 both beneficial genetic cargo and as a constant threat of cell death. Genome comparison  
349 suggests that prophage elements undergo pervasive domestication within their hosts that  
350 gradually lose the ability to reproduce via the lytic cycle<sup>59</sup>. Our current work demonstrates an  
351 opposite scenario, where after a prolonged sporulation/spore revival selection regime, a latent  
352 prophage of *B. subtilis* (SP $\beta$ )<sup>44,45</sup> regains its lytic reproductive cycle via recombination with  
353 ‘foreign’ phage DNA (phi3Ts). The fact that phi3Ts only manifests itself under specific  
354 conditions (a prolonged sporulation/spore revival selection regime) is reminiscent of  
355 previously described examples of *Proteobacteria* phages<sup>60,61</sup>. Specifically, the lytic phage SW1  
356 can thrive undetected within *E. coli* populations, but manifests itself in spontaneous plaque  
357 formation after overexpression of a putative methylase from an indigenous cryptic prophage<sup>60</sup>.  
358 Likewise, lytic variants of P22 spontaneously form upon purine starvation of the *Salmonella*  
359 *typhimurium* host<sup>61</sup>. In our case, an increase in phi3Ts DNA copy number and its integration  
360 into the chromosome took place upon application of a sporulation selection regime.

361 Exactly how sporulation promotes the spread of ‘foreign’ phage and its hybrid  
362 derivatives requires further molecular studies. There are two, not mutually exclusive,

363 hypotheses: (a) induction of the phage lytic cycle in a small fraction of sporulating cells leads  
364 to rapid amplification of phi3Ts DNA, infection of other sporulating cells, segregation of phage  
365 DNA into forespores, and trapping of many of its copies in spores, followed by the release of  
366 phages upon germination, as observed previously for lytic *B. subtilis* phages<sup>62,63</sup>; (b) since  
367 phi3T lysogeny (KY030782.1; 99.98% sequence identity with phi3Ts)<sup>47</sup> results in earlier  
368 sporulation and potentially improved spore quality, integration of this phage into the  
369 chromosome may be adaptive for the host. As the functions of most phi3Ts genes are obscure,  
370 it is difficult to identify the potential phage-encoded regulatory genes that could affect the host  
371 life cycle. One possibility is *rap-phr* cassettes (matching *rap* present in phi3T and phi3Ts) that  
372 have been previously found within other MGEs of *B. subtilis*, and have been shown to modulate  
373 the timing of sporulation<sup>52-54</sup>. Phi3Ts phage genes (e.g. *sspC*) could modulate the production  
374 of resistant and viable spores<sup>56</sup> and/or reduce sporulation failure and premature germination<sup>64</sup>.  
375 In addition, the spore revival traits of lysogens may also be indirectly affected by the  
376 modulation of sporulation timing<sup>57</sup>. Whatever the exact molecular mechanism and its  
377 evolutionary driver, the activation of latent prophage elements upon sporulation/spore revival  
378 treatment expands the intriguing connections between sporulation of *Firmicutes* and phages  
379 infecting these species<sup>29,31,43,65-67</sup>.

380           Based on comparison of the sizes and integration sites of prophage elements  
381 within *Bacillus* sp., SPβ and phi3T clearly belong to a distinct prophage group. These phages  
382 appear extremely large (2–3-fold larger than average prophages), and they possess  
383 sophisticated communication systems that are potentially capable of sensing the frequency of  
384 infected hosts<sup>47,68</sup> or biosynthetic gene clusters<sup>69,70</sup>, and functional genes related to host  
385 dormancy<sup>71,72</sup>. All these features, combined with regulatory excision upon sporulation, indicate  
386 strong codependence between SPβ-like phages and their hosts. A high level of homology  
387 between SPβ and phi3Ts offers extensive regions for homologous recombination, which can



388 be additionally promoted by the recombination machinery involved in natural competence<sup>73</sup>  
389 and in non-homologous end-joining repair<sup>74</sup>. It appears that the absence of other mobile genetic  
390 elements (e.g. ICEBs1) constraining the phage lytic cycle<sup>45</sup> may also correlate with a higher  
391 level of phage diversification. However, whether sporulation promotes recombination between  
392 SP $\beta$  and phi3Ts alongside phi3Ts amplification remains to be investigated. It is possible that  
393 such phage recombination could be facilitated by regulatory excision of SP $\beta$  from the  
394 chromosome in the sporulating mother cell<sup>29,30</sup>. It also remains to be confirmed whether all  
395 *spsM*-splitting prophage elements, such as SP $\beta$ , behave like regulatory switches as previously  
396 suggested<sup>29</sup>. The disruption of *kamA* by phi3Ts, SP $\beta$ -phi3Ts hybrids, and SP $\beta$ -like prophages  
397 in *Bacilli* suggests that this gene might also be controlled by regulatory excision.  
398 Recombination between SP $\beta$  and phi3Ts under a sporulation/spore revival selection regime is  
399 an example how new regulatory phage-host relationships may evolve.

400 In addition to regulatory switch behaviour, *Bacilli* and their large SP $\beta$ -like  
401 prophages pervasively recombine during sporulation, providing new model systems to study  
402 bacterial evolution in which phages serve as an evolutionary driving force. Ecological  
403 relevance of prophage recombination observed under lab conditions is well supported by  
404 natural diversity within the same group of prophage elements on global and local ecological  
405 scales. The crucial role of prophage elements on ecological interactions within closely related  
406 strains has already been demonstrated for other species<sup>8,60,75,76</sup>. Herein, we showed that such  
407 antagonism emerges during the early steps of phage diversification, which may suggest that  
408 speciation of prophage elements may be the first step toward speciation of host bacteria.  
409 Finally, our work sheds new light on the interplay between bacteria and their phages; while  
410 temperate phages commonly undergo domestication<sup>59</sup>, they may easily regain genetic mobility  
411 by recombination with other phages, thereby altering the physiology, social interactions and  
412 evolution of their host.

413

414

## 415 **Materials and Methods**

416 **Strains and cultivation conditions.** Supplementary Table S2 describes the bacterial strains  
417 used in this study and Supplementary Table S3 lists all phages used in this work. Plasmids and  
418 oligonucleotides used for cloning purposes to construct some of the strains used here are listed  
419 in Supplementary Table S4. Strains were routinely maintained in lysogeny broth (LB) medium  
420 (LB-Lennox, Carl Roth; 10 g/l tryptone, 5 g/l yeast extract, and 5 g/l NaCl).

421 Strain DTUB200 was obtained by infecting DK1042 (WT NCBI 3610) with a phage phi3T  
422 obtained from CU1065. DTUB201 ( $\Delta$ SP $\beta$ ) was obtained by transforming DK1042 with gDNA  
423 obtained from SPmini and selecting for erythromycin-resistant colonies. Strain DTUB202  
424 ( $\Delta$ kamA) was obtained by transforming DK1042 with gDNA obtained from BKK19690 and  
425 selecting for kanamycin-resistant colonies. All modifications of DK1042 were verified by PCR  
426 followed by Sanger sequencing. Strain DTUB203 ( $P_L$ -gfp) was obtained by transforming  
427 DK1042 with pDTUB206 ( $P_L$ -gfp) plasmid and selecting for chloramphenicol-resistant  
428 colonies. To obtain this plasmid,  $P_L$  promoter was amplified from *B. subtilis* 168 gDNA using  
429 oAD10 and oAD11, introducing the EcoRI and NheI restriction sites. The PCR product was  
430 then ligated into pre-digested pGFP-rrnB plasmid to obtain pDTUB206. Strains DTUB204 ( $P_L$ -  
431 *gfp*<sup>phi3T</sup>) and DTUB205 ( $P_L$ -*gfp*<sup>phi3Ts</sup>) were obtain by infecting the DTUB203 with phi3T and  
432 phi3Ts phages, respectively.

433

## 434 **Genome sequencing and analysis**

435 Phage sequencing was performed by Illumina MiSeq instrument and a 2x250 nt paired-end  
436 chemistry (MiSeq Reagent Kit v2 (500-cycles). Primary data analysis (base-calling) was

437 carried out with Bbcl2fastq<sup>^</sup> software (v2.17.1.14, Illumina). In vitro fragment libraries were  
438 prepared using the NEBNext<sup>®</sup> Ultra<sup>™</sup> II DNA Library Prep Kit for Illumina. Reads were  
439 quality and length trimmed in CLC Genomics Workbench Tool 11.0 and *de novo* genome  
440 assembly was performed using SPAdes-3.13.0-Linux and CLC Genomics Workbench 11.0.

441 *De novo* sequencing and assembly of B310mA, B410mB and B410wtB genomes was  
442 performed by Functional Genomics Center Zurich, from genomic DNA of exponentially grown  
443 cultures, extracted using the EURex Bacterial and Yeast Genomic DNA Kit. Resequencing of  
444 168 ancestor (ancestor of B310mA, B410mB and B410wtB) was described in our previous  
445 manuscript<sup>44</sup>.

446 Evolved PY79 strains (presented in Suppl. dataset 2) were obtained as previously described<sup>50</sup>.  
447 Samples for whole-genome sequencing were prepared according to the Illumina Multiplexing  
448 Sample Preparation Guide, using NEBNext reagents and Illumina's indexed primers.  
449 Sequencing was performed by the Bauer Core Facility at Harvard University. Mapping of raw  
450 fastq reads to reference PY79 genome (NC\_022898.1) was performed using Bowtie2<sup>77,78</sup>. The  
451 alignment was sorted using SAMtools<sup>79,80</sup>, data filtering and SNP variant calling was  
452 performed using the bcftools package. Mapping of raw fastq reads to phi3T genome  
453 (KY030782.1) was performed using Bowtie2 in Galaxy platform ([https://cpt.tamu.edu/galaxy-](https://cpt.tamu.edu/galaxy-pub)  
454 [pub](https://cpt.tamu.edu/galaxy-pub)) and coverage was visualized in the browser using Trackster tool. Mapping of raw SOLiD  
455 resequencing reads (168<sub>anc</sub>) to unique phi3Ts fragments was performed using CLC Genomics  
456 Workbench 11.0.1. Short phi3T fragments, to which fastq could be mapped, showed over 90%  
457 sequence identity to PY79 genome, as confirmed by BLAST. All bacterial and phage genomes  
458 sequenced during this work, were deposited at NCBI database as completed genomes and/or  
459 raw sequencing data (Table 1).

460 Raw re-sequencing data of PY79 strains<sup>50</sup> and available from B. Burton  
461 (briana.burton@wisc.edu). Raw re-sequencing data of 168 cultivated under near- zero growth  
462 conditions<sup>51</sup> are available from O. Kuipers (o.p.kuipers@rug.nl).

### 463 **Sporulation and germination assays**

464 To examine sporulation dynamics selected strains were cultivated in MSgg medium<sup>81</sup> at 30°C,  
465 220 rpm, and total CFU and spore counts were analysed after 12, 24 and 36 hours. To access  
466 the spore count, cells were incubated at 80°C for 20min, plated on LB-agar (1.5%) and the  
467 number of obtained colonies was divided by the number of colonies obtained prior to the heat-  
468 treatment. To access the germination, the culture incubation was prolonged to 72h to allow vast  
469 majority of cells to sporulate. Next, spores were washed 2× with 0.9% NaCl, and resuspended  
470 in germination solution (0.6g KH<sub>2</sub>PO<sub>4</sub>, 1.4g K<sub>2</sub>HPO<sub>4</sub>, 0.2g (NH<sub>4</sub>)<sub>2</sub>SO<sub>4</sub>, 0.1g Na-citrate, 0.02g  
471 MgSO<sub>4</sub>×7H<sub>2</sub>O, 0.5g glucose, 3.56g L-alanine resuspended in 100ml of dH<sub>2</sub>O) to reach final  
472 OD<sub>600</sub> cca 10. Decline of OD<sub>600</sub> was measured immediately, indicating germination<sup>82</sup>.  
473 Additional assessment of germination dynamics was performed using real-time brightfield  
474 microscopy by inducing spores with L-alanine on agarose pads, as described previously<sup>57</sup>.  
475 Agarose pads (1.5%, 9 mm diameter, 1 mm height) were inoculated with 2.6 µl spore solution  
476 (3.75\*10<sup>5</sup> spores µl<sup>-1</sup>) and placed upside down into a 24-well glass-bottom microtiter plate.  
477 Germination was induced by adding 5 µl of a 200 mM L-alanine solution to the top of the pad.  
478 Germination events were monitored by changes in grey level spore intensity. The fraction of  
479 germinated spores at time t was calculated as the number of germinated spores divided by the  
480 number of dormant spores before induction (i.e.by excluding pre-germinated spores).

481

482

483

#### 484 **Spore selection experiment with NCBI 3610**

485 Strains were cultivated in 10ml of MSgg medium in 100ml-glass bottles in 30°C with shaking  
486 at 220 rpm. Every 48 hours, three alternative transfer methods were applied: direct transfer of  
487 untreated cells to fresh medium, transfer of heat-treated cells (80°C for 20 min) and transfer of  
488 chemically treated cells (5% NaOH for 2 min, followed by washing in PBS). In each case, fresh  
489 cultures were initiated with 1% inoculum. Culture supernatants and cell pellets were collected  
490 prior each transfer to monitor phage release and genetic rearrangements, respectively. At each  
491 transfer, frozen stocks were preserved, to allow the analysis of subsequent steps of phage  
492 recombination in the future.

#### 493 **Isolation of phage particles and phage DNA**

494 All lysogenic strains that were used as source of phages, were producing phage particles  
495 spontaneously, therefore treatment with Mitomycin C was not needed to obtain phages from  
496 culture supernatants. Lysogens were cultivated in LB medium at 37°C with shaking at  
497 200 rpm for 8h. Culture supernatants were collected, adjusted to pH of 7.0, filter-sterilized  
498 and mixed at a 1:4 rate with PEG-8000 solution (PEG-8000 20%, 116 g/l NaCl). After  
499 overnight incubation at 4°C, the solutions were centrifuged for 60 min at 12000 rpm to  
500 obtain phage precipitates. The pellets were resuspended in 1% of the initial volume in SM  
501 buffer (5.8 g/l NaCl, 0.96 g/l MgSO<sub>4</sub>, 6 g/l Tris-HCl, pH 7.5) to obtain concentrated solution  
502 of phage particles. Such phage solutions were visualized by transmission electron  
503 microscopy and used as a source of different phage variants, purified from single plaques.  
504 In plaque assay and further phage propagation from single plaques, Δ6 strain<sup>83</sup> was used as  
505 a host. Specifically, phage solutions were diluted in order to obtain well-separated single  
506 plaques. Selected plaques (differing with morphology) were carefully removed from the soft  
507 agar using sterile scalpel, resuspended in 200μl of SM buffer and used to infect

508 exponentially growing phage-free host to allow propagation of selected phage variants.  
509 Phages were subsequently propagated in soft agar and liquid host suspension until the titer  
510 reached at least  $10^9$  pfu/ml and then subjected to DNA isolation. Phage DNA was extracted  
511 using phenol-chloroform method, as described previously<sup>84</sup>.

### 512 **Transmission electron microscopy**

513 Before use, 400 mesh nickel grids with a 3-4 nm thick carbon film, CF400-Ni-UL EMS  
514 Diasum, were hydrophilized by 30 sec of electric glow discharging. Next, 5 $\mu$ l of purified  
515 phage solutions were applied onto the grids and allowed to adsorb for 1 minute. The grids  
516 were rinsed 3 times on droplets of milliQ water and subjected to staining with 2% uranyl  
517 acetate. Specifically, with a help of EM grid-grade tweezers, the grids were placed  
518 sequentially on droplets of 2% uranyl acetate solution for 10 sec, 2 sec and 20 sec. Excess  
519 uranyl acetate was wicked away using filter paper and the grids were allowed to dry  
520 overnight and stored in a desiccator until analysis. Transmission electron microscopy was  
521 performed utilizing a FEI Tecnai T12 Biotwin TEM operating at 120 kV located at the Center  
522 for Electron Nanoscopy at the Technical University of Denmark, and images were acquired  
523 using a Bottom mounted CCD, Gatan Orius SC1000WC.

### 524 **Prophage database construction and phage comparisons**

525 *Bacillus* prophage database was constructed by finding genomic coordinates using Phaster  
526 software<sup>85,86</sup> from fully assembled *Bacillus* genomes available at NCBI, followed by extraction  
527 of phage genomes using samtools package. In total, the initial database contained 350 strains,  
528 which altogether carried 1365 prophage elements. Out of these prophages, 54 were selected for  
529 further analysis according to following criteria: all prophages larger than 80kB (regardless of  
530 integration side) and all prophages that are at least 50 kB, integrated between 1.9-2.3 Mb in the  
531 chromosome, just like SP $\beta$  and phi3Ts-SP $\beta$  hybrids identified in the evolved strains.  
532 Additional prophages, categorized as SP $\beta$ -like, were retrieved the genomes that gave BLAST

533 hits to phi3T and SP $\beta$ , if these hits belonged to a prophage region that was at least 40kB  
534 (confirmed by Phaster). All genomes that were re-sequenced copies of *Bacillus subtilis* 168  
535 were removed. In addition, genomes that were starting and finishing with a prophage (likely  
536 due to misassembly), were removed (NZ\_CP032855.1). Overall, 78 *Bacillus* strains lysogenic  
537 for putative SP $\beta$ -like prophages were subjected to further analysis.

538            Interruption of *spsM* and *kamA* in all the selected lysogens was examined by  
539 genome BLAST against the sequence of an intact copy of these gene. All strains that carried a  
540 split copy of *spsM* and *kamA*, also carried a large prophage between left and right arms of these  
541 genes. In such cases, the Phaster-predicted terminal positions of the prophage was corrected to  
542 exactly match the sequence splitting *spsM* or *kamA*. Such correction was based on  
543 experimentally confirmed sequences of phage DNA. Integration genes of remaining large  
544 prophages were determined by extracting and clustering 1000bp-long prophage flanking  
545 regions using vsearch at 46% identity. These regions were then compared to well-annotated *B.*  
546 *subtilis* 168, using blastx, to find functional homologs.

547            The alignment of prophage sequences was performed in MAFFT program<sup>87</sup>,  
548 phylogenetic tree was build using FastTree<sup>88,89</sup> and visualized in CLC Main Workbench.  
549 Phylogenetic tree of *B. subtilis* host strains was constructed using open software autoMLST  
550 (<https://automlst.ziemertlab.com/>)<sup>90</sup> based on 100 shared proteins. Two strains that were not  
551 lysogenic for SP $\beta$ -like prophage (MB9\_B4 and MB9\_B6) were included in the analysis to  
552 exclude SP $\beta$  prophage from the shared pool of proteins in the tree building. The three was  
553 visualized in CLC Main Workbench. Prophage annotation was performed using RAST online  
554 annotation platform.

555

556

557 **Statistical analysis**

558 Statistical differences between two experimental groups were identified using two-tailed  
559 Student's *t*-tests assuming equal variance. No statistical methods were used to predetermine  
560 sample size and the experiments were not randomized.

561 **Authors contributions:**

562 AD, PB, ZH, CK performed experiments. AD and MLS performed bioinformatics analysis. PK  
563 performed electron microscopy, GM performed genome sequencing and analyzed the data, BB  
564 and BMB shared sequencing data. AD and ATK designed the study. AD wrote the manuscript.  
565 All authors contributed to final version of the manuscript.

566

567 **Acknowledgements:**

568 The authors thank M. Kilstrup, P. Sazinas, K. Middleboe, D. Castillio and P. Stefanic for their  
569 valuable comments. We are profoundly grateful to O. Kuipers, A. de Jong and W. Overkamp  
570 from University of Groningen, for sharing their raw sequencing data and all relevant  
571 information, which allowed us to finalize the manuscript. This project has received funding  
572 from the European Union's Horizon 2020 research and innovation programme under the Marie  
573 Skłodowska-Curie grant agreement No 713683 (H.C. Ørsted COFUND to A.D.), Individual  
574 grant from Friedrich Schiller University Jena to support postdoc researchers to A.D., and  
575 supported by the Danish National Research Foundation (DNRF137) for the Center for  
576 Microbial Secondary Metabolites. Funded in part by NIH R01GM121865 to BMB.

577

578

579



580 **Figure legends:**

581 **Figure 1.** Changes within *B. subtilis* prophage sequence and integration site observed after  
582 prolonged sporulation selection regime. A) Experimental evolution with sporulation selection  
583 regime leads to spontaneous release of phage particles by the evolved strains<sup>44</sup>. B). Overnight  
584 culture of evolved *B. subtilis* strain B410mB (*amyE::mKate*, shown in red) was diluted 100×  
585 and spotted on the lawn of undiluted *B. subtilis* ancestor strain (*amyE::gfp*, shown in green),  
586 resulting in a clearance zone, and growth of B410mB in that zone. The same experiment was  
587 performed using 100x diluted culture of ancestor strain (*amyE::mKate*) on a lawn of undiluted  
588 ancestor (*amyE::gfp*), as control. Scale bar=2.5mm. C) Schematic representation of genome  
589 rearrangements in one of the phage-releasing evolved strains (B310mA), compared to the  
590 ancestor (Anc). The evolved strains carry a hybrid prophage phi3Ts-SPβ. Fragments of phi3Ts  
591 are shown in black, while fragments of SPβ are shown in pink. Below, schematic representation  
592 of phage genomes, spontaneously released by B310mA. D) Schematic comparison of phi3Ts  
593 genome, with genome of Bacillus phage phi3T (KY030782.1). Fragment ‘s’ which is unique  
594 for phi3Ts, can be detected within prophage genomes of 6 *B. subtilis* strains, isolated in  
595 different parts of the world, specifically: SRCM103612 (South Korea), MB9\_B1 and MB8\_B1  
596 (Denmark), JAAA (China), HMNig-2 (Egypt) and SSJ-1 (South Korea).

597 **Figure 2.** Extrachromosomal fragments of phage DNA, detected in the evolved strains. Top:  
598 Genome comparison of phi3Ts and SPβ (Query cover=58%, Percent Identity=99.73%), where  
599 regions of high homology (73.6-100%) are shown in grey, and regions of 99% homology are  
600 connected. Segments that are unique for phi3Ts, or SPβ are highlighted in black and pink,  
601 respectively. Phage genomes are arranged according to their integration into the host  
602 chromosome, which is represented in red. Below: extrachromosomal phage DNA fragments  
603 detected during PacBio sequencing, colored according to their homology to phi3Ts, SPβ, or  
604 fragments of host chromosome flanking phage integration sites. Fragments are ordered

605 according to sequencing coverage relative to the chromosomal region, which is represented as  
606 bar chart on the left.

607 **Figure 3.** Detection of phi3Ts DNA in the ancestor strain *B. subtilis* 168 through mapping of  
608 raw sequencing reads. Top: Representation of phi3Ts genome according to its homology to  
609 SPβ prophage. Fragments of high homology to SPβ (73.6-100%) are shown in grey, while  
610 fragments that are unique to phi3Ts are shown in black. Bars 1,2 and 3 correspond to DNA  
611 sequences that are unique for phi3Ts and that were used as targets for raw reads mapping (lower  
612 part). Green and red bars represent reads obtained from forward and reverse strands,  
613 respectively.

614 **Figure 4.** Effect of phi3T infection on *B. subtilis* sporulation and germination dynamics. A)  
615 Sporulation dynamics. Percentage of spores compared to total cell count, were examined in *B.*  
616 *subtilis* 3610 and the same strain infected with phi3T phage, in 3 different time points of growth  
617 in minimal medium (MSgg). Data represent an average from 4 biological replicates, error bars  
618 correspond to standard error.

619 **Figure 5.** Overview of prophage elements of natural *Bacillus* sp. isolates. A) Prophage  
620 elements were extracted from fully assembled genomes of *Bacillus* sp. and plotted according  
621 to size and integration position in the chromosome. Cluster of large prophages, integrated in  
622 the area of replication terminus could be detected (black dotted line). B) Schematic  
623 representation of SPβ-like prophage found in *B. subtilis* SRCM 103612, isolated from  
624 traditional Korean food. The prophage genome was colored according to its homology to  
625 phi3Ts and SPβ. Extrachromosomal phage DNA found in this strain is matching left and right  
626 arms of the chromosomal prophage.

627 **Figure 6.** Natural diversity of SPβ-like phages. A). Phylogenetic tree of *B. subtilis* strains that  
628 carry SPβ-like prophage in *spsM* or *kamA* gene, and two control strains that are free from such

629 prophage. The tree was arbitrarily divided into 6 clades. B) Phylogenetic tree of SP $\beta$ -like  
 630 prophages hosted by the strains in A). Inner circle shows prophage integration site, while outer  
 631 circle indicates presence/absence of conjugative element ICEBs1, which blocks SP $\beta$  lytic cycle  
 632 C). Selected prophages of *Bacillus* sp. colored according to their homology to phi3T and SP $\beta$ .  
 633 The upper 4 sequences integrate either in *kamA* or *spsM* and clearly belong to SP $\beta$ -like phages.  
 634 Bottom four sequences come from other *Bacillus* species, and although they are more distant  
 635 to phi3T or SP $\beta$ , they still carry segments of high homology with these phages. Explanation of  
 636 ICEBs1 figure legend: intact – intact copy (100% identity to *B. subtilis* 168 or NCBI 3610) of  
 637 ICEBs1 conjugative element is present; negative – lack of BLAST hits to ICEBs1 sequence;  
 638 partial – at least 70% of ICEBs1 sequence is present; residual – less than 5% of ICEBs1  
 639 sequence is present.

640 **Table 1** | List of bacterial strain and phages subjected to genome sequencing with  
 641 corresponding NCBI accession numbers.

| Name of bacterial strain/phage | Data                        | Accession number |
|--------------------------------|-----------------------------|------------------|
| B310mA                         | Complete genome             | CP051860         |
| B410mB                         | Complete genome             | CP053102*        |
| B410wtB                        | Complete genome             | CP052842*        |
| B310mA                         | Sequencing reads (Illumina) | SRR11561554      |
| B410mB                         | Sequencing reads (Illumina) | SRR1156151       |
| B410wtB                        | Sequencing reads (Illumina) | SRR11561552      |
| 168 <sub>ancestor</sub>        | Sequencing reads (SOLiD)    | SRR11559011      |
| NCBI 3610                      | Sequencing reads (Illumina) | SRR11559035      |
| 15.1                           | Sequencing reads (Illumina) | SRR11566357      |
| 16.1                           | Sequencing reads (Illumina) | SRR11566355      |

|                            |                             |             |
|----------------------------|-----------------------------|-------------|
| 16.2                       | Sequencing reads (Illumina) | SRR11566354 |
| phi3Ts                     | Complete genome             | MT366945    |
| Hyb1 <sup>phi3Ts-SPβ</sup> | Complete genome             | MT366946    |
| Hyb2 <sup>phi3Ts-SPβ</sup> | Complete genome             | MT366947    |
| Hyb3 <sup>phi3Ts-SPβ</sup> | Complete genome             | MT366948    |
| phi3Ts                     | Sequencing reads (Illumina) | SRR11587866 |
| Hyb1 <sup>phi3Ts-SPβ</sup> | Sequencing reads (Illumina) | SRR11587864 |
| Hyb2 <sup>phi3Ts-SPβ</sup> | Sequencing reads (Illumina) | SRR11587865 |
| Hyb3 <sup>phi3Ts-SPβ</sup> | Sequencing reads (Illumina) | SRR11587867 |

642 \*extrachromosomal phage fragments: B410wtB - CP052843; B410mB – supplementary  
643 dataset 4.

644

- 645 1. Knowles, B. *et al.* Lytic to temperate switching of viral communities. *Nature* **531**,  
646 466–470 (2016).
- 647 2. Koskella, B. & Brockhurst, M. A. Bacteria–phage coevolution as a driver of ecological  
648 and evolutionary processes in microbial communities. *FEMS Microbiol. Rev.* **38**, 916–  
649 931 (2014).
- 650 3. Azam, A. H. & Tanji, Y. Bacteriophage-host arm race: an update on the mechanism of  
651 phage resistance in bacteria and revenge of the phage with the perspective for phage  
652 therapy. *Appl. Microbiol. Biotechnol.* **103**, 2121–2131 (2019).
- 653 4. Howard-Varona, C., Hargreaves, K. R., Abedon, S. T. & Sullivan, M. B. Lysogeny in  
654 nature: mechanisms, impact and ecology of temperate phages. *ISME J.* **11**, 1511–1520  
655 (2017).

- 656 5. Harrison, E. & Brockhurst, M. A. Ecological and evolutionary benefits of temperate  
657 phage: what does or doesn't kill you makes you stronger. *BioEssays* **39**, 1700112  
658 (2017).
- 659 6. Davies, E. V., Winstanley, C., Fothergill, J. L. & James, C. E. The role of temperate  
660 bacteriophages in bacterial infection. *FEMS Microbiol. Lett.* **363**, fnw015 (2016).
- 661 7. Kim, M. S. & Bae, J. W. Lysogeny is prevalent and widely distributed in the murine  
662 gut microbiota. *ISME J.* **12**, 1127–1141 (2018).
- 663 8. Štefanič, P., Kraigher, B., Lyons, N. A., Kolter, R. & Mandić-Mulec, I. Kin  
664 discrimination between sympatric *Bacillus subtilis* isolates. *Proc. Natl. Acad. Sci.*  
665 *U.S.A.* **112**, 14042–14047 (2015).
- 666 9. Lyons, N. A., Kraigher, B., Štefanič, P., Mandić-Mulec, I. & Kolter, R. A  
667 combinatorial kin discrimination system in *Bacillus subtilis*. *Curr. Biol.* **26**, 733–742  
668 (2016).
- 669 10. Canchaya, C., Proux, C., Fournous, G., Bruttin, A. & Brüßow, H. Prophage genomics.  
670 *Microbiol. Mol. Biol. Rev.* **67**, 238–76, (2003).
- 671 11. Bérard, S. *et al.* Aligning the unalignable: bacteriophage whole genome alignments.  
672 *BMC Bioinformatics* **17**, 30 (2016).
- 673 12. Botstein, D. A theory of modular evolution for bacteriophages. *Ann. N. Y. Acad. Sci.*  
674 **354**, 484–491 (1980).
- 675 13. Hatfull, G. F. & Hendrix, R. W. Bacteriophages and their genomes. *Curr. Opin. Virol.*  
676 **1**, 298–303 (2011).
- 677 14. De Paepe, M. *et al.* Temperate phages acquire DNA from defective prophages by  
678 relaxed homologous recombination: the role of Rad52-like recombinases. *PLoS Genet.*

- 679           **10**, (2014).
- 680   15.   Swenson, K. M., Guertin, P., Deschênes, H. & Bergeron, A. Reconstructing the  
681       modular recombination history of *Staphylococcus aureus* phages. *BMC Bioinformatics*  
682       **14**, S17 (2013).
- 683   16.   Morris, P., Marinelli, L. J., Jacobs-Sera, D., Hendrix, R. W. & Hatfull, G. F. Genomic  
684       characterization of mycobacteriophage giles: Evidence for phage acquisition of host  
685       DNA by illegitimate recombination. *J. Bacteriol.* **190**, 2172–2182 (2008).
- 686   17.   Bobay, L.-M., Touchon, M. & Rocha, E. P. C. Manipulating or superseding host  
687       recombination functions: A dilemma that shapes phage evolvability. *PLoS Genet.* **9**,  
688       e1003825 (2013).
- 689   18.   Spancake, G. A., Hemphill, H. E. & Fink, P. S. Genome organization of Sp beta c2  
690       bacteriophage carrying the *thyP3* gene. *J. Bacteriol.* **157**, 428–34 (1984).
- 691   19.   Fillol-Salom, A. *et al.* Bacteriophages benefit from generalized transduction. *PLOS*  
692       *Pathog.* **15**, e1007888 (2019).
- 693   20.   Uchiyama, J. *et al.* Intragenus generalized transduction in *Staphylococcus* spp. by a  
694       novel giant phage. *ISME J.* **8**, 1949–1952 (2014).
- 695   21.   Morse, M. L., Lederberg, E. M. & Lederberg, J. Transduction in *Escherichia coli* K-  
696       12. *Genetics* **41**, 142–56 (1956).
- 697   22.   Fukumaki, Y., Shimada, K. & Takagi, Y. Specialized transduction of Colicin E1 DNA  
698       in *Escherichia coli* K-12 by phage Lambda. *Proc. Natl. Acad. Sci. U. S. A.* **73**, 3238–  
699       3242
- 700   23.   Penadés, J. R., Chen, J., Quiles-Puchalt, N., Carpena, N. & Novick, R. P.  
701       Bacteriophage-mediated spread of bacterial virulence genes. *Current Opinion in*

- 702            *Microbiology* **23**, 171–178 (2015).
- 703    24.    Kupczok, A. *et al.* Rates of mutation and recombination in *Siphoviridae* phage genome  
704            evolution over three decades. *Mol. Biol. Evol.* **35**, 1147–1159 (2018).
- 705    25.    Yahara, K., Lehours, P. & Vale, F. F. Analysis of genetic recombination and the pan-  
706            genome of a highly recombinogenic bacteriophage species. *Microb. genomics* **5**,  
707            (2019).
- 708    26.    Yamamoto, N., Wohlhieter, J. A., Gemski, P. & Baron, L. S.  $\lambda$ immP22dis: A hybrid of  
709            coliphage  $\lambda$  with both immunity regions of Salmonella phage P22. *Mol. Gen. Genet.*  
710            *MGG* **166**, 233–243
- 711    27.    Botstein, D. & Herskowitz, I. Properties of hybrids between Salmonella phage P22 and  
712            coliphage  $\lambda$ . *Nature* **251**, 584–589 (1974).
- 713    28.    Feiner, R. *et al.* A new perspective on lysogeny: prophages as active regulatory  
714            switches of bacteria. *Nat. Rev. Microbiol.* **13**, 641–650 (2015).
- 715    29.    Abe, K. *et al.* Developmentally-regulated excision of the SP $\beta$  prophage reconstitutes a  
716            gene required for spore envelope maturation in *Bacillus subtilis*. *PLoS Genet.* **10**,  
717            e1004636 (2014).
- 718    30.    Abe, K., Takamatsu, T. & Sato, T. Mechanism of bacterial gene rearrangement: SprA-  
719            catalyzed precise DNA recombination and its directionality control by SprB ensure the  
720            gene rearrangement and stable expression of *spsM* during sporulation in *Bacillus*  
721            *subtilis*. *Nucleic Acids Res.* **45**, 6669–6683 (2017).
- 722    31.    Haraldsen, J. D. & Sonenshein, A. L. Efficient sporulation in *Clostridium difficile*  
723            requires disruption of the  $\sigma$ K gene. *Mol. Microbiol.* **48**, 811–821 (2003).
- 724    32.    Stragier, P., Kunkel, B., Kroos, L. & Losick, R. Chromosomal rearrangement

- 725 generating a composite gene for a developmental transcription factor. *Science* **243**,  
726 507–512 (1989).
- 727 33. Wood, J. P. *et al.* Environmental persistence of *Bacillus anthracis* and *Bacillus subtilis*  
728 spores. *PLoS One* **10**, e0138083 (2015).
- 729 34. Cano, R. J. & Borucki, M. K. Revival and identification of bacterial spores in 25- to  
730 40-million-year-old Dominican amber. *Science* **268**, 1060–1064 (1995).
- 731 35. Sanchez-Vizueté, P. *et al.* Identification of *ypqP* as a new *Bacillus subtilis* biofilm  
732 determinant that mediates the protection of *Staphylococcus aureus* against  
733 antimicrobial agents in mixed-species communities. *Appl. Environ. Microbiol.* **81**,  
734 109–118 (2015).
- 735 36. Kimura, T., Amaya, Y., Kobayashi, K., Ogasawara, N. & Sato, T. Repression of *sigK*  
736 intervening (*skin*) element gene expression by the CI-like protein SknR and effect of  
737 SknR depletion on growth of *Bacillus subtilis* cells. *J. Bacteriol.* **192**, 6209–6216  
738 (2010).
- 739 37. Kunkel, B., Losick, R. & Stragier, P. The *Bacillus subtilis* gene for the developmental  
740 transcription factor  $\sigma(K)$  is generated by excision of a dispensable DNA element  
741 containing a sporulation recombinase gene. *Genes Dev.* **4**, 525–535 (1990).
- 742 38. Pyne, M. E., Liu, X., Moo-Young, M., Chung, D. A. & Chou, C. P. Genome-directed  
743 analysis of prophage excision, host defence systems, and central fermentative  
744 metabolism in *Clostridium pasteurianum*. *Sci. Rep.* **6**, 26228 (2016).
- 745 39. Sohail, A., Hayes, C. S., Divvela, P., Setlow, P. & Bhagwat, A. S. Protection of DNA  
746 by  $\alpha/\beta$ -type small, acid-soluble proteins from *Bacillus subtilis* spores against cytosine  
747 deamination. *Biochemistry* **41**, 11325–11330 (2002).



- 748 40. Ki, S. L., Bumbaca, D., Kosman, J., Setlow, P. & Jedrzejewski, M. J. Structure of a  
749 protein-DNA complex essential for DNA protection in spores of *Bacillus* species.  
750 *Proc. Natl. Acad. Sci. U. S. A.* **105**, 2806–2811 (2008).
- 751 41. Jiang, M., Grau, R. & Perego, M. Differential processing of propeptide inhibitors of  
752 rap phosphatases in *Bacillus subtilis*. *J. Bacteriol.* **182**, 303–310 (2000).
- 753 42. Serra, C. R., Earl, A. M., Barbosa, T. M., Kolter, R. & Henriques, A. O. Sporulation  
754 during growth in a gut isolate of *Bacillus subtilis*. *J. Bacteriol.* **196**, 4184–4196 (2014).
- 755 43. Silver-Mysliwiec, T. H. & Bramucci, M. G. Bacteriophage-enhanced sporulation:  
756 Comparison of spore-converting bacteriophages PMB12 and SP10. *J. Bacteriol.* **172**,  
757 1948–1953 (1990).
- 758 44. Martin, M. *et al.* De novo evolved interference competition promotes the spread of  
759 biofilm defectors. *Nat. Commun.* **8**, 15127 (2017).
- 760 45. Eleina England, by M. & Bell Professor of Biology, S. P. Effects of cell growth and a  
761 mobile genetic element on propagation of the phages SP16 and SP-beta in *Bacillus*  
762 *subtilis* (2014).
- 763 46. Warner, F. D. *et al.* Characterization of SPP: a temperate bacteriophage from *Bacillus*  
764 *subtilis* 168M. *Can J Microbiol* **23**, 45-51 (1976).
- 765 47. Erez, Z. *et al.* Communication between viruses guides lysis-lysogeny decisions. *Nature*  
766 **541**, 488–493 (2017).
- 767 48. Dennehy, J. J. Bacteriophage Ecology: Population growth, evolution, and impact of  
768 bacterial viruses. Part of Advances in Molecular and Cellular Biology - *The Quarterly*  
769 *Review of Biology* (2010).
- 770 49. Gallegos-Monterrosa, R., Mhatre, E. & Kovács, A. T. Specific *Bacillus subtilis* 168

- 771 variants form biofilms on nutrient- rich medium. *Microbiology* 2016;162:1922–32.ch  
772 medium. *Microbiology* **162**, 1922–1932 (2016).
- 773 50. Bose, B., Reed, S. E., Besprozvannaya, M. & Burton, B. M. Missense mutations allow  
774 a sequence-blind mutant of SpoIIIE to successfully translocate chromosomes during  
775 sporulation. *PLoS One* **11**, e0148365 (2016).
- 776 51. Overkamp, W. *et al.* Physiological and cell morphology adaptation of *Bacillus subtilis*  
777 at near-zero specific growth rates: A transcriptome analysis. *Environ. Microbiol.* **17**,  
778 346–363 (2015).
- 779 52. Omer Bendori, S., Pollak, S., Hizi, D. & Eldar, A. The RapP-PhrP quorum-sensing  
780 system of *Bacillus subtilis* strain NCIB3610 affects biofilm formation through multiple  
781 targets, due to an atypical signal-insensitive allele of RapP. *J. Bacteriol.* **197**, 592–602  
782 (2015).
- 783 53. Singh, P. K. *et al.* Mobility of the native *Bacillus subtilis* conjugative plasmid pLS20  
784 is regulated by intercellular signaling. *PLoS Genet.* **9**, e1003892 (2013).
- 785 54. Auchtung, J. M., Lee, C. A., Monson, R. E., Lehman, A. P. & Grossman, A. D.  
786 Regulation of a *Bacillus subtilis* mobile genetic element by intercellular signaling and  
787 the global DNA damage response. *Proc. Natl. Acad. Sci. U. S. A.* **102**, 12554–12559  
788 (2005).
- 789 55. Perego, M. & Hoch, J. A. Cell-cell communication regulates the effects of protein  
790 aspartate phosphatases on the phosphorelay controlling development in *Bacillus*  
791 *subtilis*. *Proc. Natl. Acad. Sci. U. S. A.* **93**, 1549–53 (1996).
- 792 56. Tovar-Rojo, F. & Setlow, P. Effects of mutant small, acid-soluble spore proteins from  
793 *Bacillus subtilis* on DNA in vivo and in vitro. *J. Bacteriol.* **173**, 4827–4835 (1991).

- 794 57. Mutlu, A. *et al.* Phenotypic memory in *Bacillus subtilis* links dormancy entry and exit  
795 by a spore quantity-quality tradeoff. *Nat. Commun.* **9**, (2018).
- 796 58. Kiesevalter, H. T. *et al.* Complete genome sequences of 13 *Bacillus subtilis* soil  
797 isolates for studying secondary metabolite diversity. *Microbiol. Resour. Announc.* **9**,  
798 (2020).
- 799 59. Bobay, L.-M., Touchon, M. & Rocha, E. P. C. Pervasive domestication of defective  
800 prophages by bacteria. *Proc. Natl. Acad. Sci.* **111**, 12127–12132 (2014).
- 801 60. Song, S., Guo, Y., Kim, J.-S., Wang, X. & Wood, T. K. Phages mediate bacterial self-  
802 recognition. *Cell Rep.* **27**, 737-749.e4 (2019).
- 803 61. Downs, D. M. & Roth, J. R. A novel P22 prophage in *Salmonella typhimurium*.  
804 *Genetics* **117**, 367–80 (1987).
- 805 62. Moreno, F. On the trapping of phage genomes in spores of *Bacillus subtilis* 168  
806 reciprocal exclusion of phages  $\phi 29$  and  $\phi e$  during outgrowth of spores. *Virology* **93**,  
807 357–368 (1979).
- 808 63. Sonenshein, A. L. Trapping of unreplicated phage DNA into spores of *Bacillus subtilis*  
809 and its stabilization against damage by  $^{32}\text{P}$  decay. *Virology* **42**, 488–495 (1970).
- 810 64. Ramírez-Guadiana, F. H., Meeske, A. J., Wang, X., Rodrigues, C. D. A. & Rudner, D.  
811 Z. The *Bacillus subtilis* germinant receptor GerA triggers premature germination in  
812 response to morphological defects during sporulation. *Mol. Microbiol.* **105**, 689–704  
813 (2017).
- 814 65. Lewis, R. J., Brannigan, J. A., Offen, W. A., Smith, I. & Wilkinson, A. J. An  
815 evolutionary link between sporulation and prophage induction in the structure of a  
816 repressor:anti-repressor complex. *J. Mol. Biol.* **283**, 907–912 (1998).

- 817 66. Sonenshein, A. L. Bacteriophages: How bacterial spores capture and protect phage  
818 DNA. *Current Biology* **16**, (2006).
- 819 67. Castilla-Llorente, V., Muñoz-Espín, D., Villar, L., Salas, M. & Meijer, W. J. J. Spo0A,  
820 the key transcriptional regulator for entrance into sporulation, is an inhibitor of DNA  
821 replication. *EMBO J.* **25**, 3890–3899 (2006).
- 822 68. Babel, H. *et al.* Ratiometric population sensing by a pump-probe signaling system in  
823 *Bacillus subtilis*. *Nat. Commun.* **11**, 1–13 (2020).
- 824 69. Paik, S. H., Chakicherla, A. & Hansen, J. N. Identification and characterization of the  
825 structural and transporter genes for, and the chemical and biological properties of,  
826 sublancin 168, a novel lantibiotic produced by *Bacillus subtilis* 168. *J. Biol. Chem.*  
827 **273**, 23134–23142 (1998).
- 828 70. Denham, E. L. *et al.* Differential expression of a prophage-encoded glycoicin and its  
829 immunity protein suggests a mutualistic strategy of a phage and its host. *Sci. Rep.* **9**,  
830 2845 (2019).
- 831 71. Lazarevic, V. *et al.* Nucleotide sequence of the *Bacillus subtilis* temperate  
832 bacteriophage SP $\beta$ c2. *Microbiology* **145**, 1055–1067 (1999).
- 833 72. Moeller, R., Setlow, P., Reitz, G. & Nicholson, W. L. Roles of small, acid-soluble  
834 spore proteins and core water content in survival of *Bacillus subtilis* spores exposed to  
835 environmental solar UV radiation. *Appl. Environ. Microbiol.* **75**, 5202–8 (2009).
- 836 73. Schultz, D., Wolynes, P. G., Jacob, E. Ben & Onuchic, J. N. Deciding fate in adverse  
837 times: Sporulation and competence in *Bacillus subtilis*.
- 838 74. de Vega, M. The minimal *Bacillus subtilis* nonhomologous end joining repair  
839 machinery. *PLoS One* **8**, e64232 (2013).

- 840 75. Lyons, N. A., Kraigher, B., Stefanic, P., Mandic-Mulec, I. & Kolter, R. A  
841 Combinatorial kin discrimination system in *Bacillus subtilis*. *Curr. Biol.* **26**, 733–42  
842 (2016).
- 843 76. Dey, A. *et al.* Sibling rivalry in *Myxococcus xanthus* is mediated by kin recognition  
844 and a polyploid prophage. *J. Bacteriol.* **198**, 994–1004 (2016).
- 845 77. Langmead, B., Wilks, C., Antonescu, V. & Charles, R. Scaling read aligners to  
846 hundreds of threads on general-purpose processors. *Bioinformatics* **35**, 421–432  
847 (2019).
- 848 78. Langmead, B. & Salzberg, S. L. Fast gapped-read alignment with Bowtie 2. *Nat.*  
849 *Methods* **9**, 357–359 (2012).
- 850 79. Li, H. *et al.* The Sequence Alignment/Map format and SAMtools. *Bioinformatics* **25**,  
851 2078–2079 (2009).
- 852 80. Li, H. A statistical framework for SNP calling, mutation discovery, association  
853 mapping and population genetical parameter estimation from sequencing data.  
854 *Bioinformatics* **27**, 2987–2993 (2011).
- 855 81. Branda, S. S., Gonzalez-Pastor, J. E., Ben-Yehuda, S., Losick, R. & Kolter, R. Fruiting  
856 body formation by *Bacillus subtilis*. *Proc. Natl. Acad. Sci. U. S. A.* **98**, 11621–11626  
857 (2001).
- 858 82. Harwood, C. R. & Cutting, S. M. Molecular biological methods for *Bacillus*. (Wiley,  
859 1990).
- 860 83. Westers, H. *et al.* Genome engineering reveals large dispensable regions in *Bacillus*  
861 *subtilis*. *Mol. Biol. Evol.* **20**, 2076–2090 (2003).
- 862 84. Tóth, I., Sváb, D., Bálint, B., Brown-Jaque, M. & Maróti, G. Comparative analysis of

- 863 the Shiga toxin converting bacteriophage first detected in *Shigella sonnei*. *Infect.*  
864 *Genet. Evol.* **37**, 150–157 (2016).
- 865 85. Zhou, Y., Liang, Y., Lynch, K. H., Dennis, J. J. & Wishart, D. S. PHAST: A Fast  
866 Phage Search Tool. *Nucleic Acids Res.* **39**, (2011).
- 867 86. Arndt, D. *et al.* PHASTER: a better, faster version of the PHAST phage search tool.  
868 *Nucleic Acids Res.* **44**, W16–W21 (2016).
- 869 87. Katoh, K. & Standley, D. M. MAFFT multiple sequence alignment software version 7:  
870 Improvements in performance and usability. *Mol. Biol. Evol.* **30**, 772–780 (2013).
- 871 88. Price, M. N., Dehal, P. S. & Arkin, A. P. FastTree: computing large minimum  
872 evolution trees with profiles instead of a distance matrix. *Mol. Biol. Evol.* **26**, 1641–  
873 1650 (2009).
- 874 89. Price, M. N., Dehal, P. S. & Arkin, A. P. FastTree 2 - Approximately maximum-  
875 likelihood trees for large alignments. *PLoS One* **5**, (2010).
- 876 90. Alanjary, M., Steinke, K. & Ziemert, N. AutoMLST: an automated web server for  
877 generating multi-locus species trees highlighting natural product potential. *Nucleic*  
878 *Acids Res.* **47**, W276–W282 (2019).
- 879 91. Konkol, M. A., Blair, K. M. & Kearns, D. B. Plasmid-encoded ComI inhibits  
880 competence in the ancestral 3610 strain of *Bacillus subtilis*. *J. Bacteriol.* **195**, 4085–  
881 4093 (2013).
- 882 92. Tucker, R. G. Acquisition of thymidylate synthetase activity by a thymine-requiring  
883 mutant of *Bacillus subtilis* following infection by the temperate phage  $\phi$ 3. *J. Gen. Virol*  
884 **4**, (1969).

885

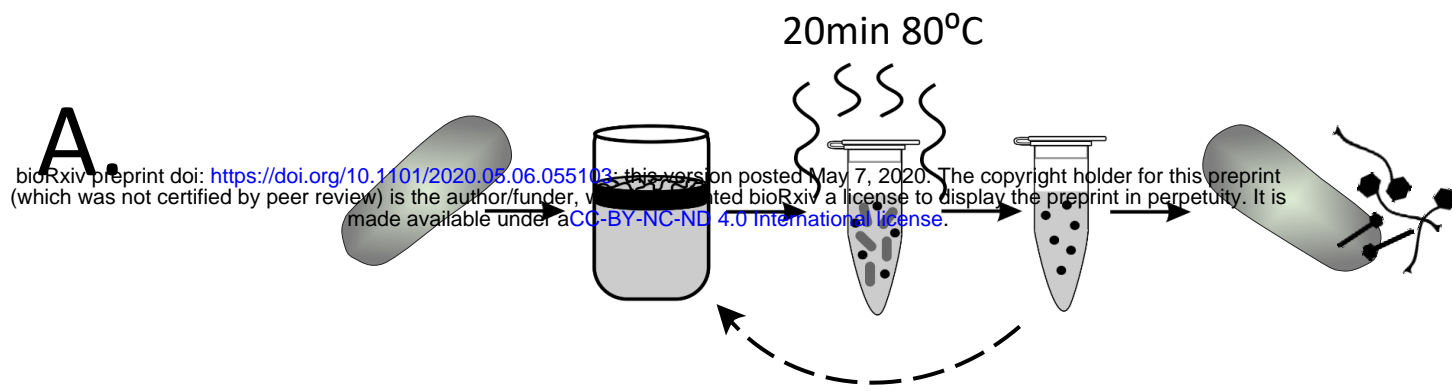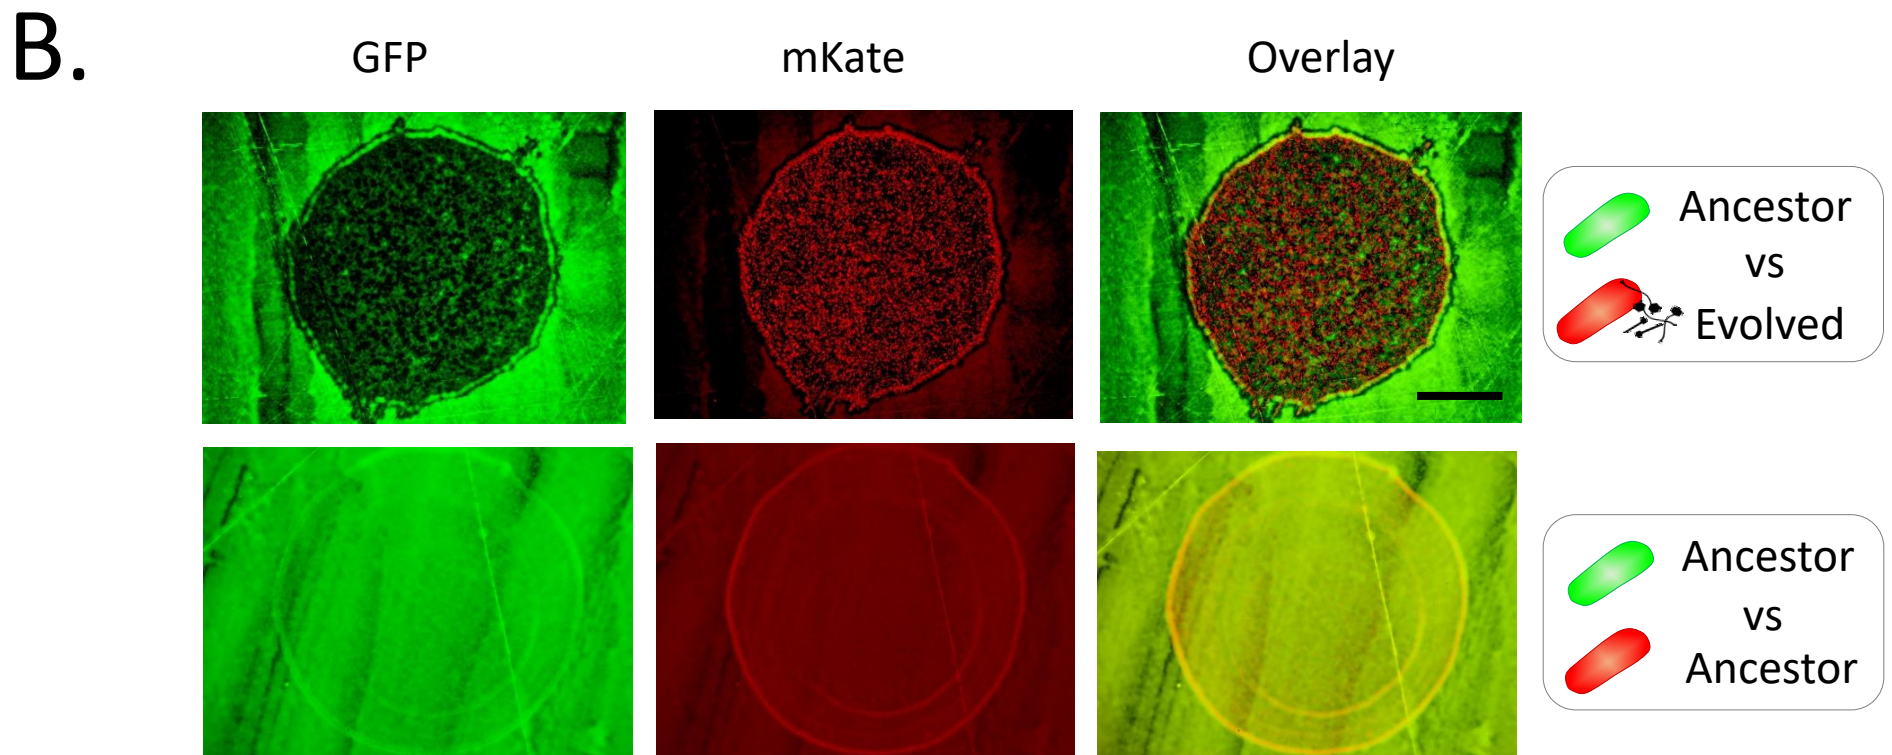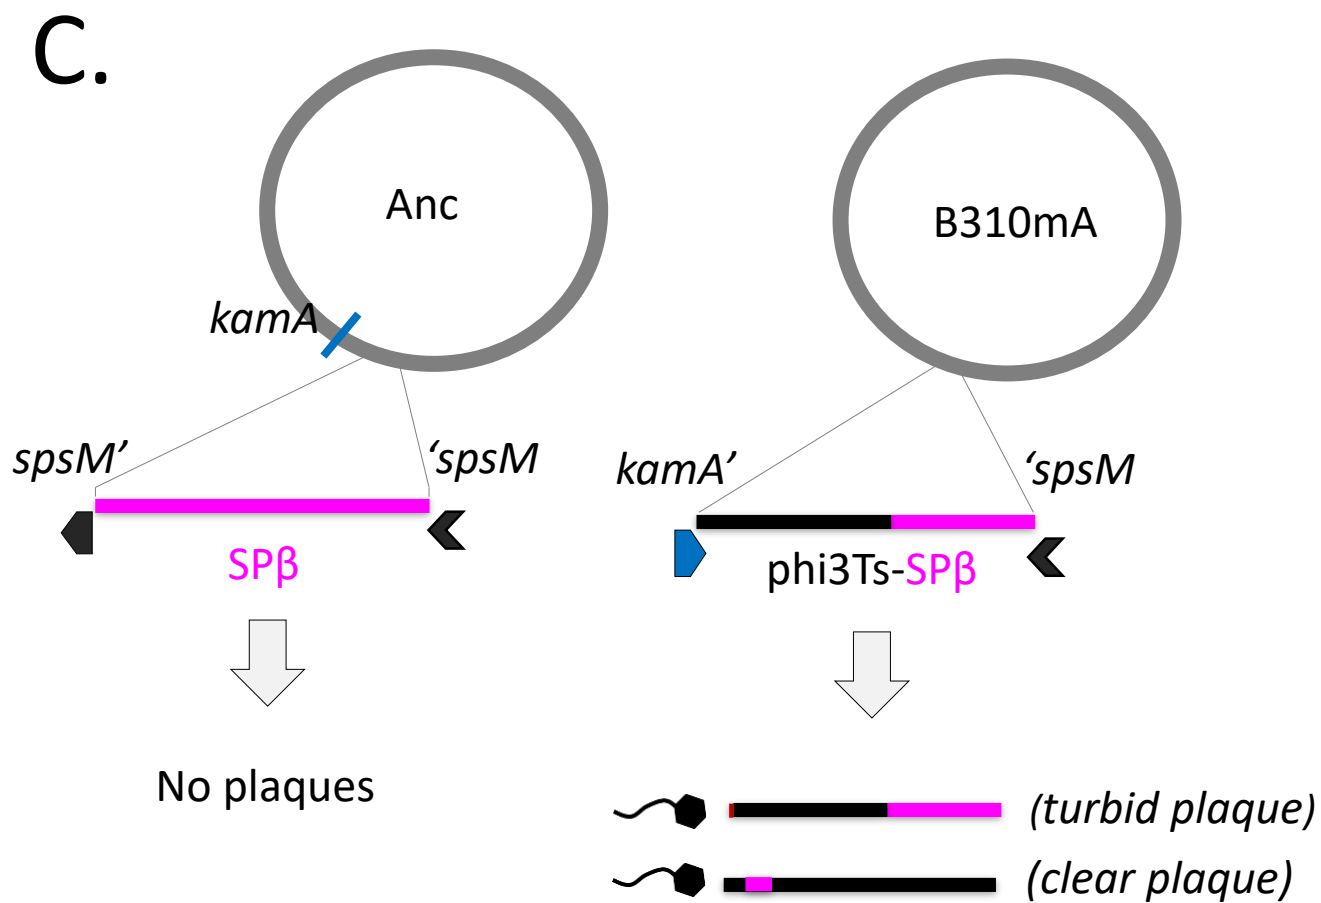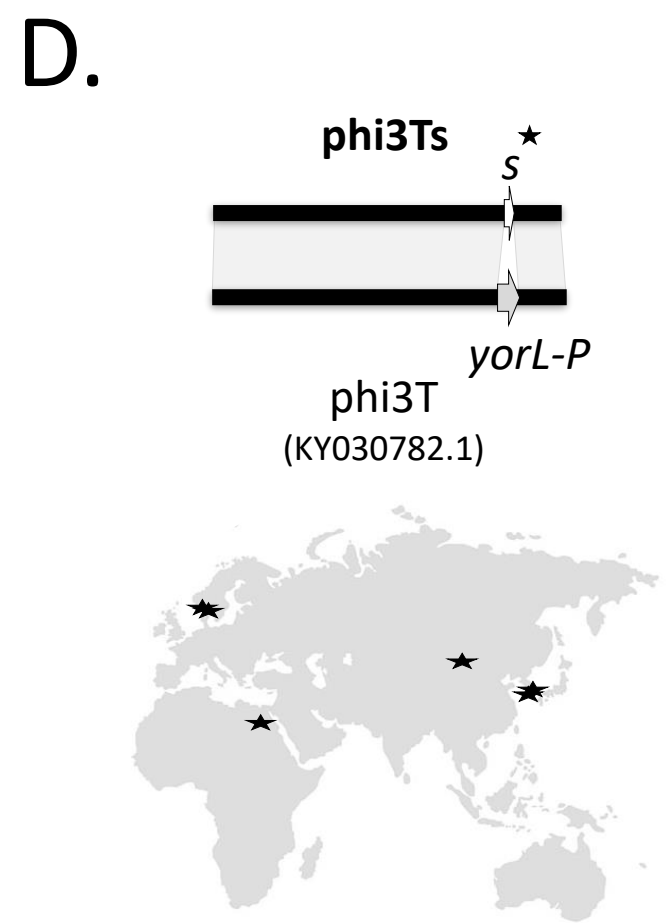

phi3Ts

Legend:

- unique for phi3Ts
- unique for SPβ
- region of high homology

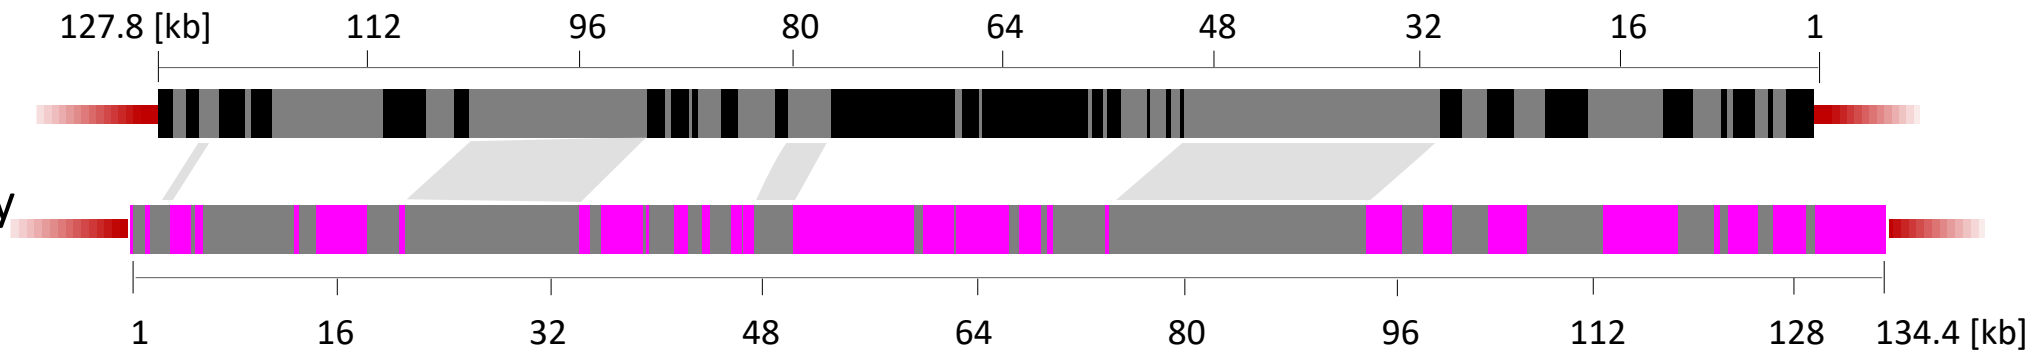

SPβ

Relative coverage

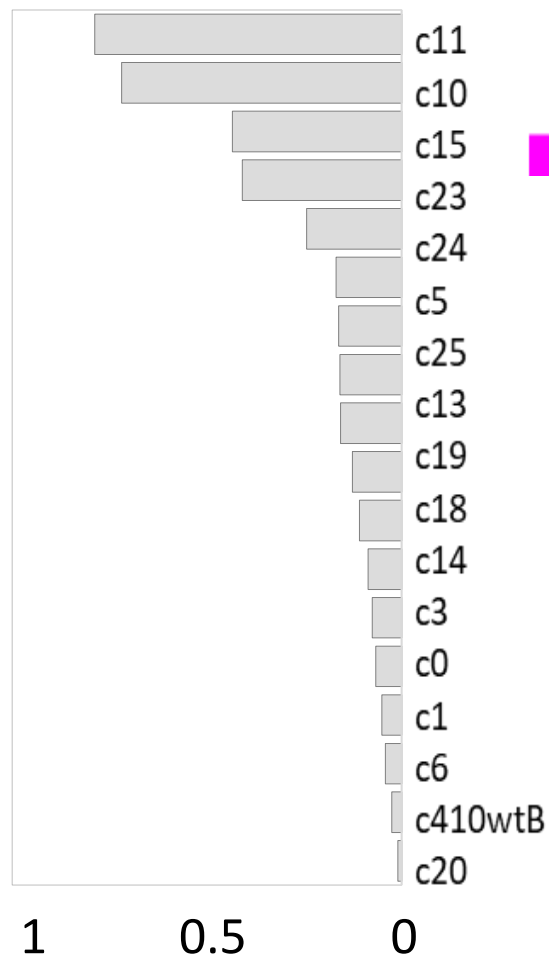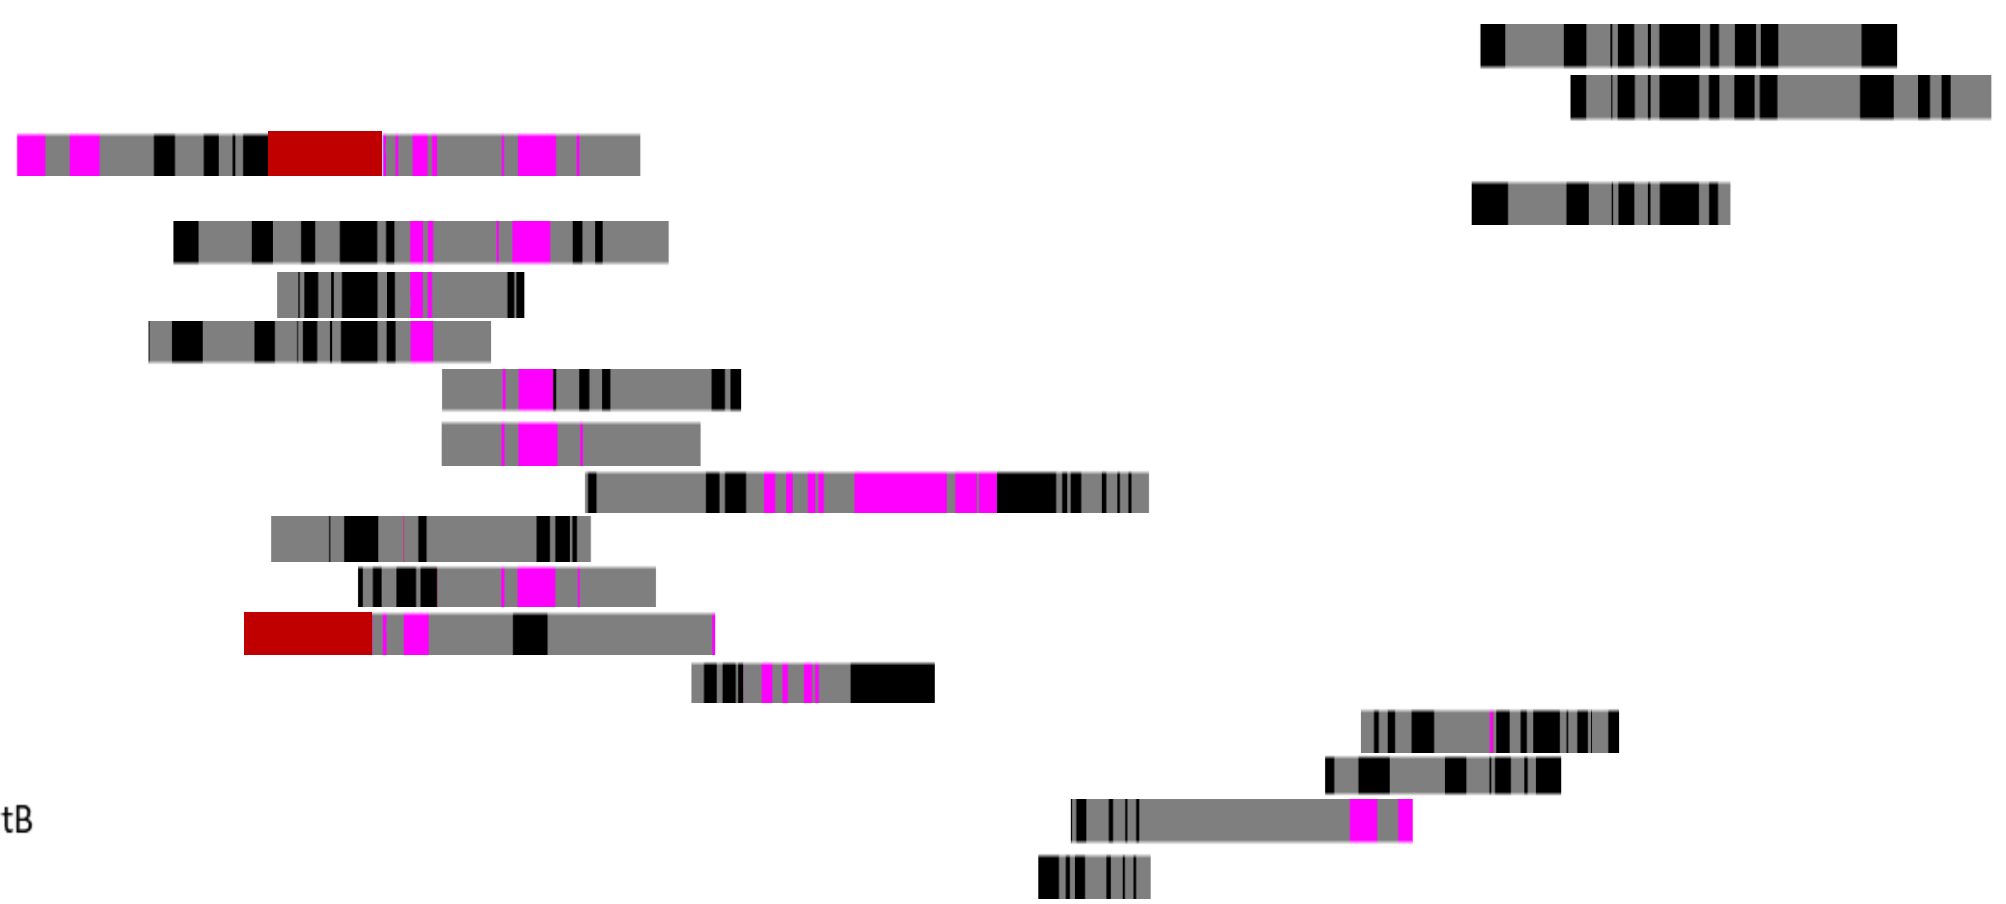



**Fig. 3**

- unique
- high homology with SP $\beta$

# phi3Ts

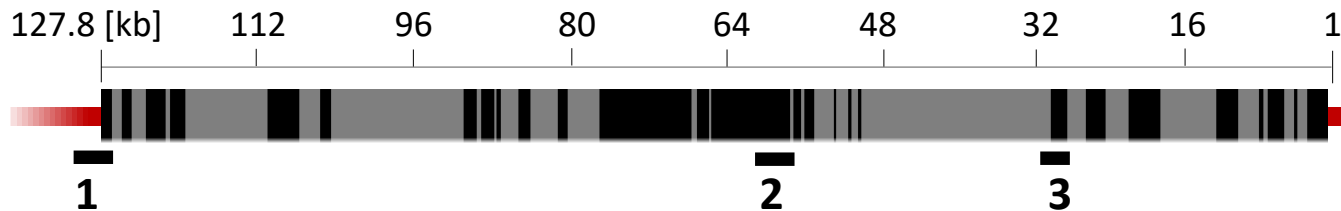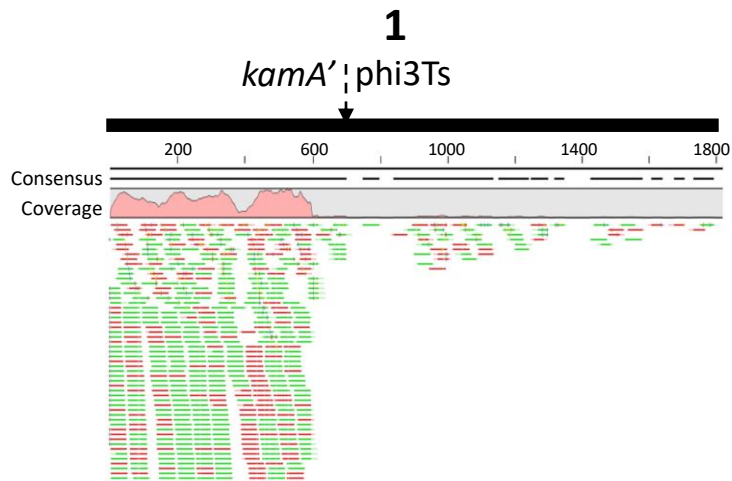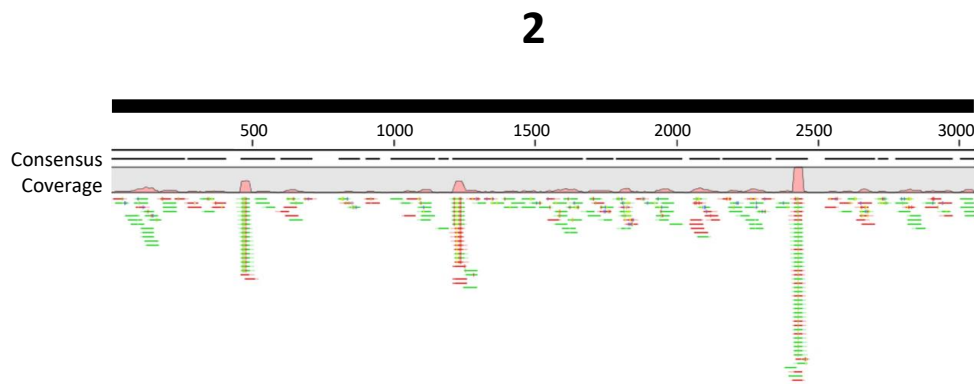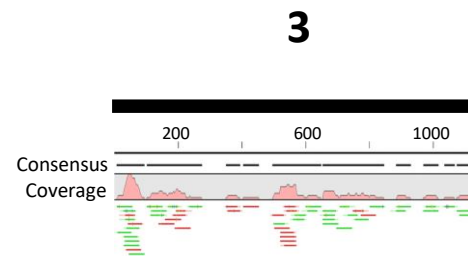

**Fig. 4**

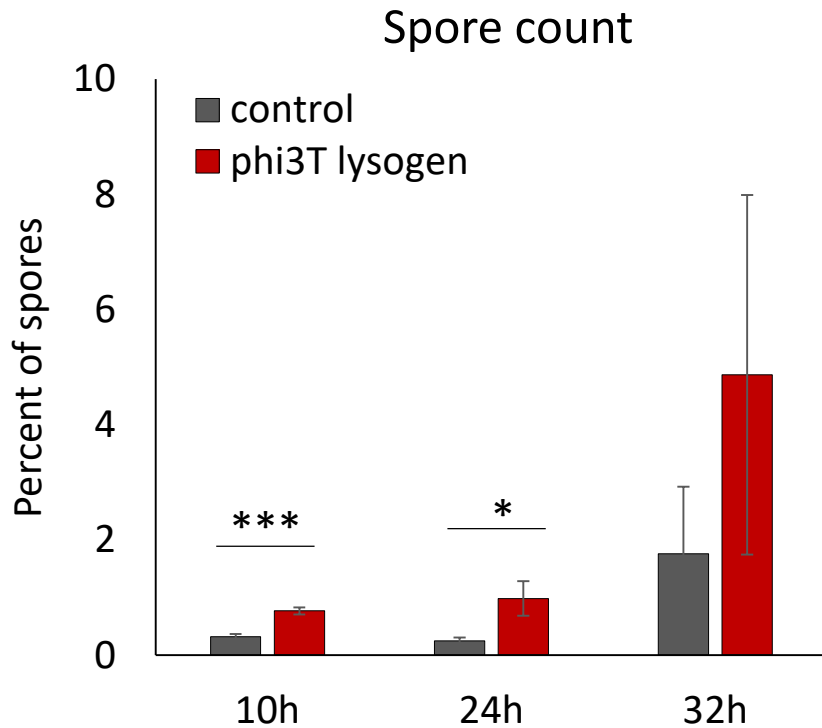

A.

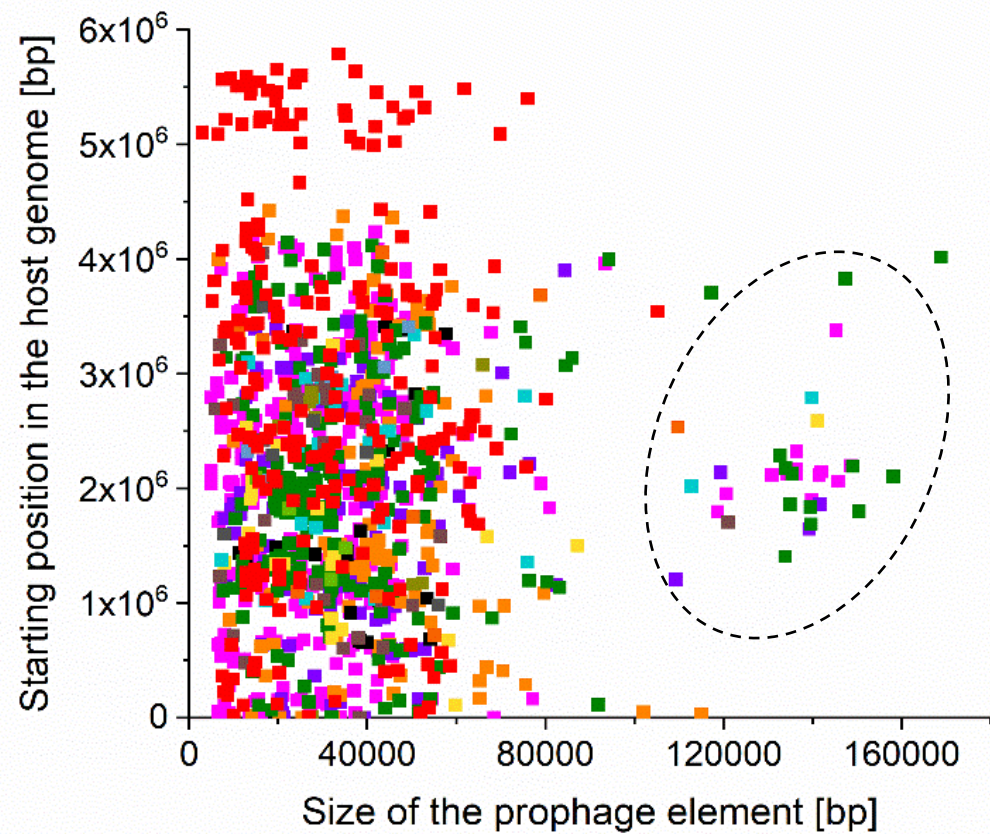

- *B. subtilis*
- *B. amyloliquefaciens*
- *B. licheniformis*
- *B. paralicheniformis*
- *B. velezensis*
- *B. atropheus*
- *B. pumilus*
- *B. safensis*
- *B. altitudinis*
- *B. sonorensis*
- *B. siamensis*
- *B. vallismortis*
- *B. xiamenensis*
- *B. cereus*

B.

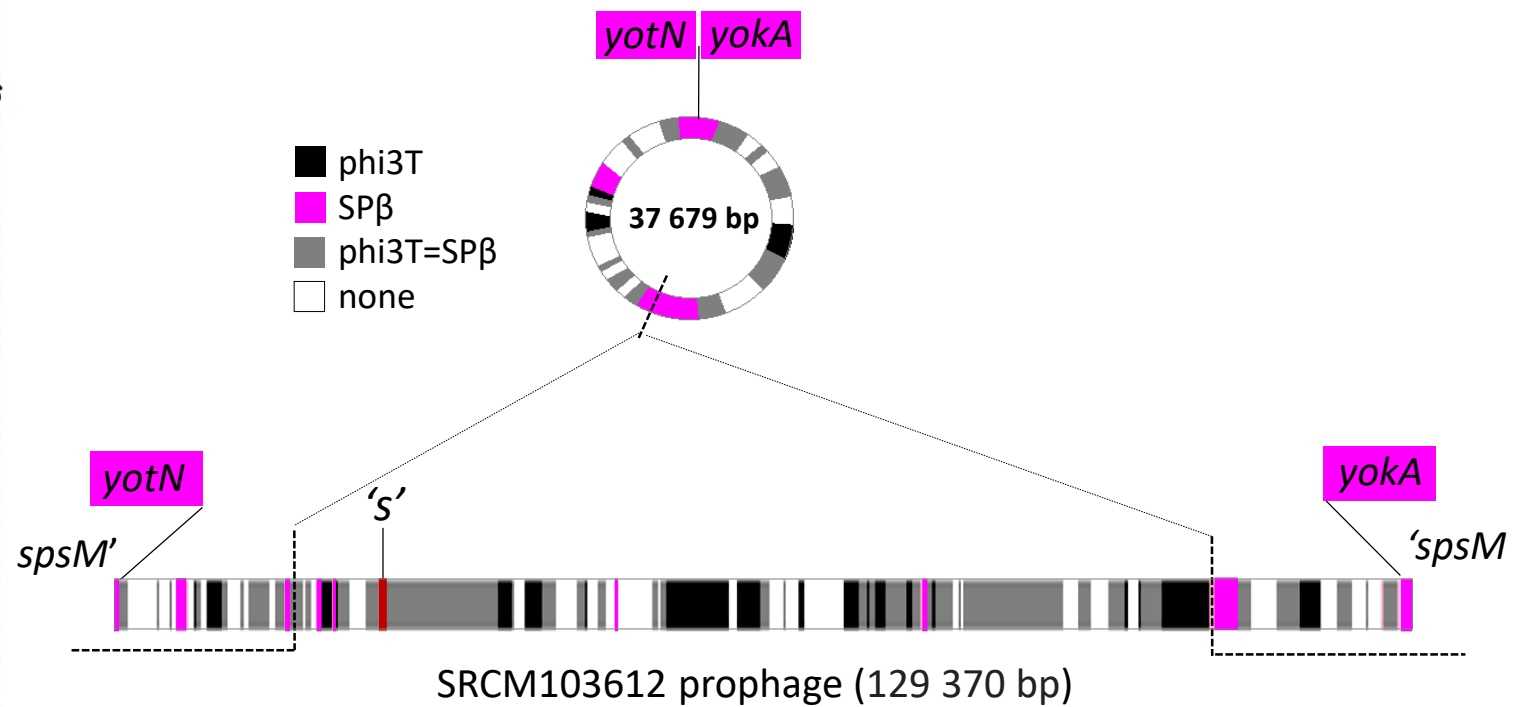

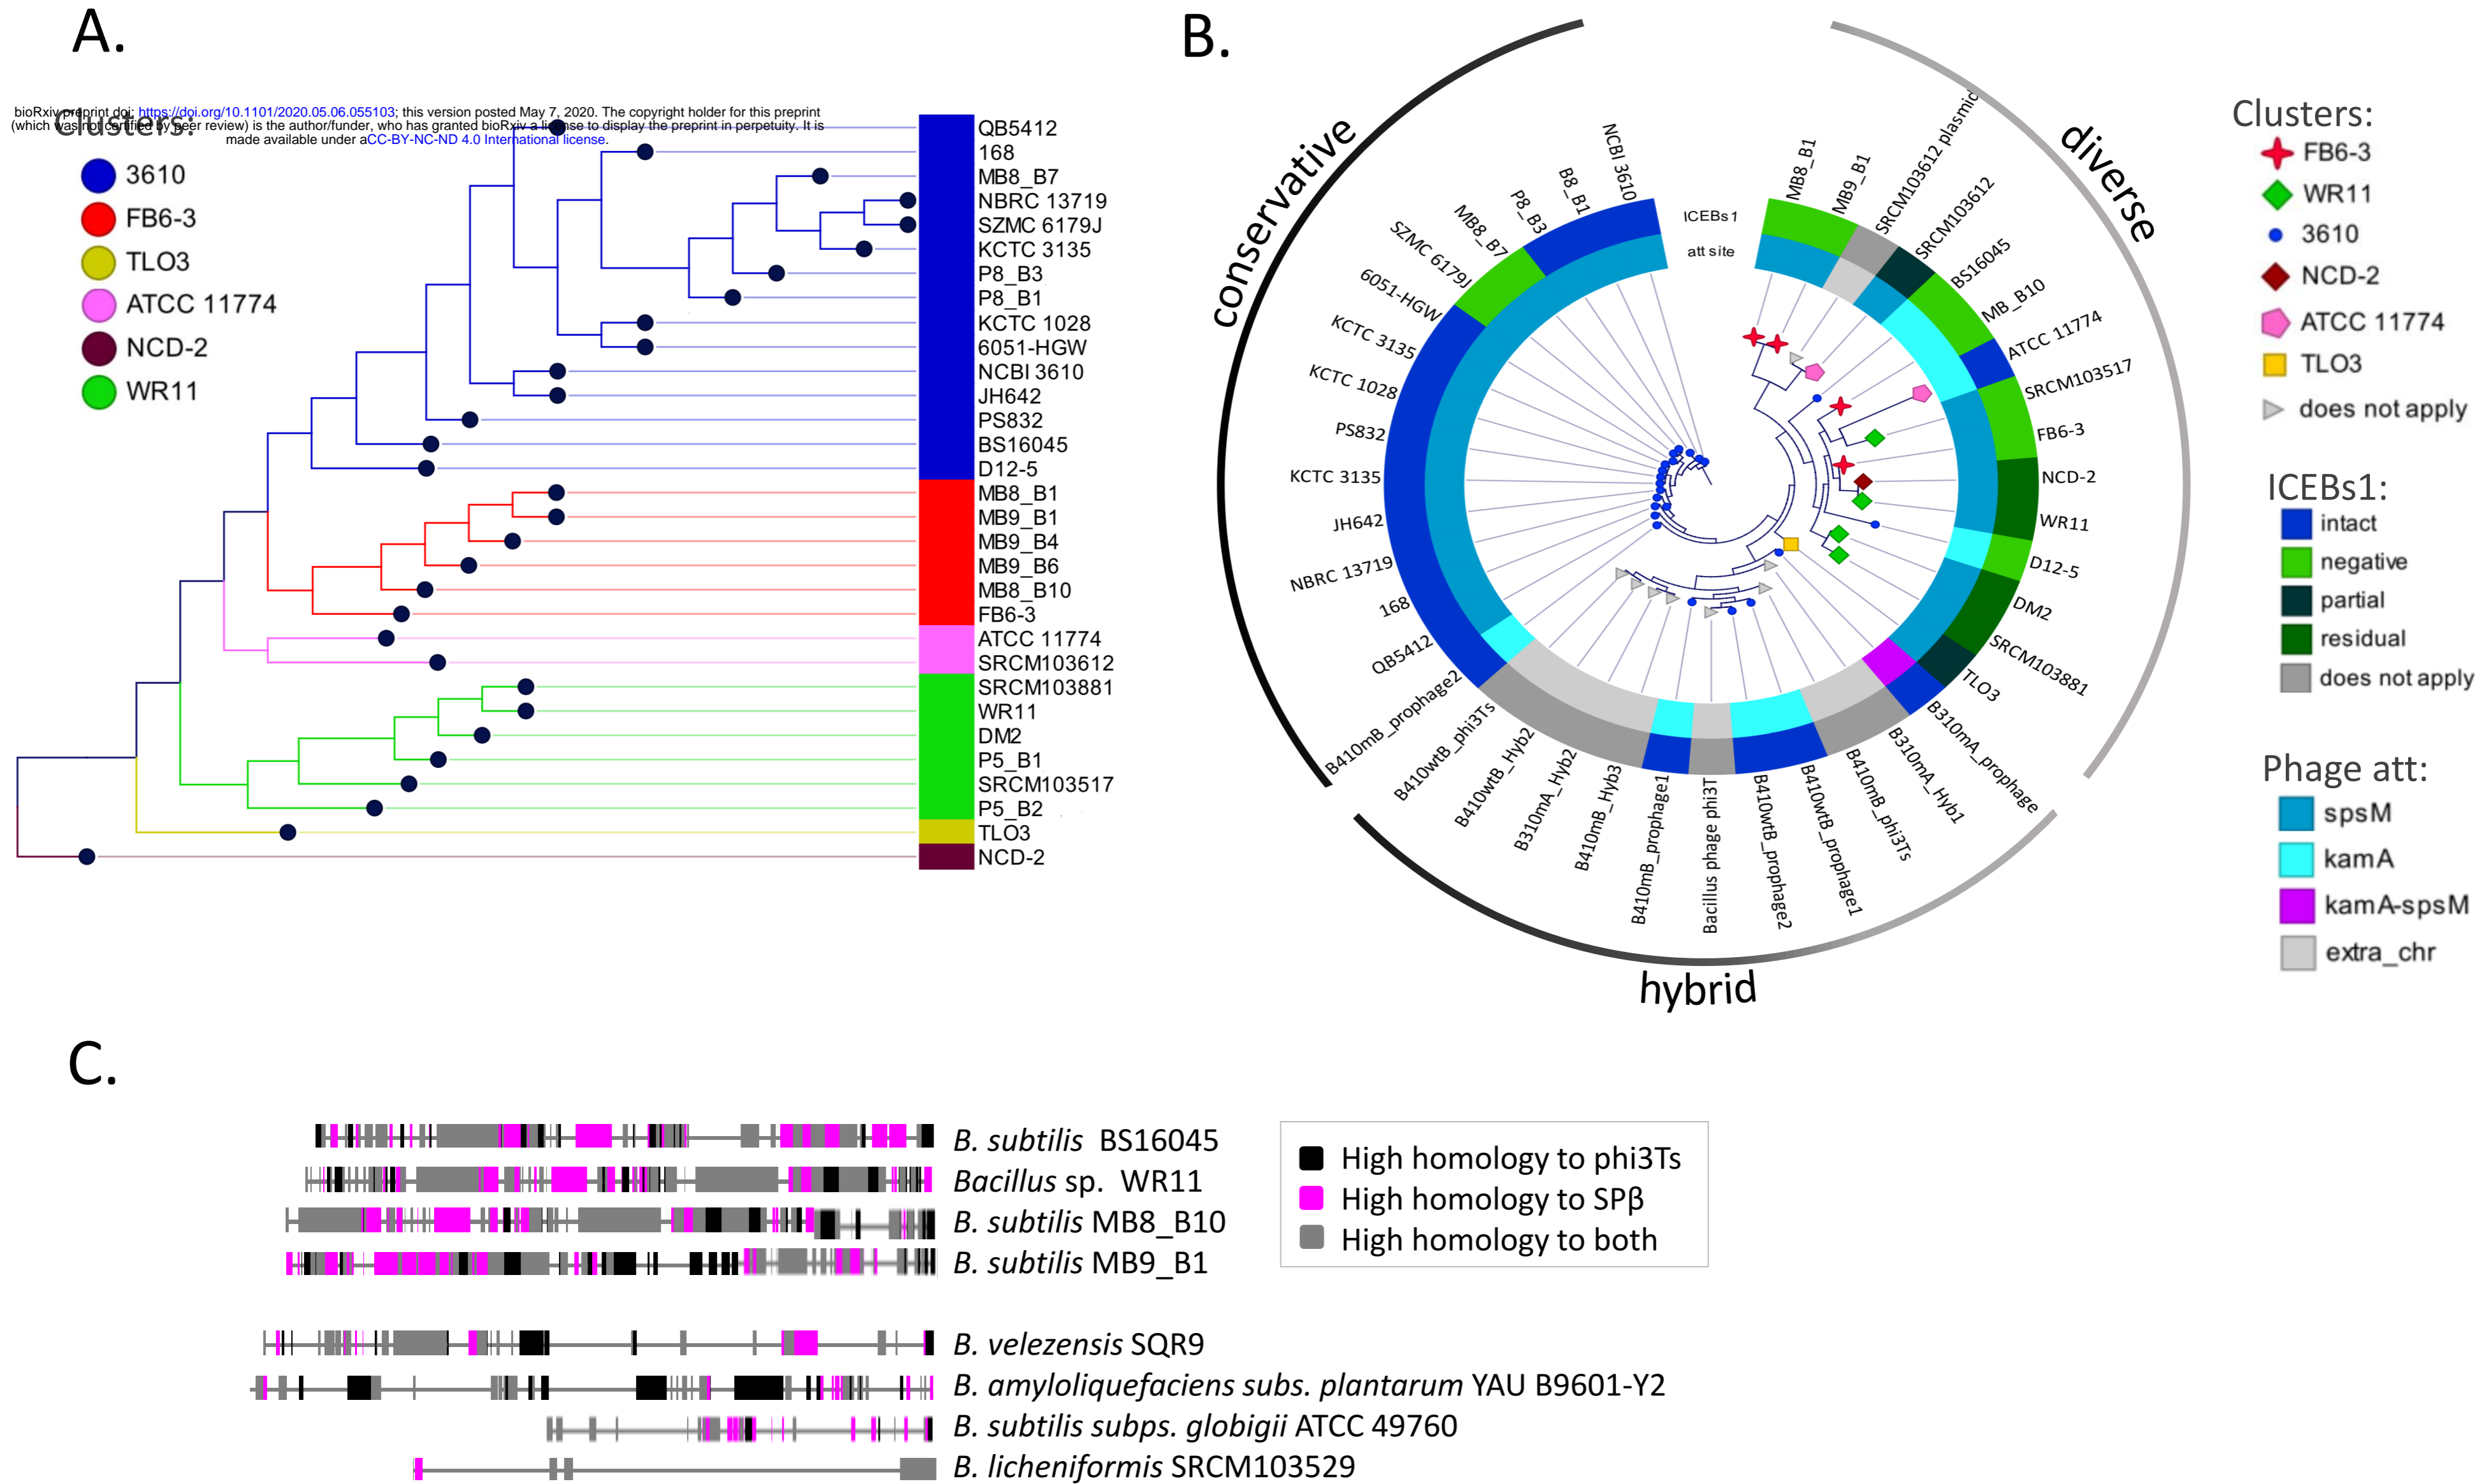

Source: https://www.biorxiv.org/content/10.1101/2020.05.06.055103v1.full.pdf
